# Supplementary material
Source: publisher figshare collection journal article supplement (https://acs.figshare.com/ndownloader/files/5715594)
Supplement: Supplementary file 1 [file 5715594]

# ic991221c.cif

;IC991221C
; 
data_c:\shelx\sx97\yaglm1t 
 
_audit_creation_method            SHELXL-97 
_chemical_name_systematic 
; 
 ? 
; 
_chemical_name_common             'monomeric La3Mo2' 
_chemical_formula_moiety          La3Mo2 
_chemical_formula_sum 
 'C36 H76 La3 Mo2 N7 O38' 
_chemical_formula_weight          1823.65 
 
loop_ 
 _atom_type_symbol 
 _atom_type_description 
 _atom_type_scat_dispersion_real 
 _atom_type_scat_dispersion_imag 
 _atom_type_scat_source 
 'La'  'La'  -0.2871   2.4523 
 'International Tables Vol C Tables 4.2.6.8 and 6.1.1.4' 
 'Mo'  'Mo'  -1.6832   0.6857 
 'International Tables Vol C Tables 4.2.6.8 and 6.1.1.4' 
 'O'  'O'   0.0106   0.0060 
 'International Tables Vol C Tables 4.2.6.8 and 6.1.1.4' 
 'N'  'N'   0.0061   0.0033 
 'International Tables Vol C Tables 4.2.6.8 and 6.1.1.4' 
 'C'  'C'   0.0033   0.0016 
 'International Tables Vol C Tables 4.2.6.8 and 6.1.1.4' 
 'H'  'H'   0.0000   0.0000 
 'International Tables Vol C Tables 4.2.6.8 and 6.1.1.4' 
 
_symmetry_cell_setting            monoclinic 
_symmetry_space_group_name_H-M    'P 21 /c' 
 
loop_ 
 _symmetry_equiv_pos_as_xyz 
 'x, y, z' 
 '-x, y+1/2, -z+1/2' 
 '-x, -y, -z' 
 'x, -y-1/2, z-1/2' 
 
_cell_length_a                    12.647(6) 
_cell_length_b                    23.554(5) 
_cell_length_c                    24.523(6) 
_cell_angle_alpha                 90.00 
_cell_angle_beta                  104.30(3) 
_cell_angle_gamma                 90.00 
_cell_volume                      7079(4) 
_cell_formula_units_Z             4 
_cell_measurement_temperature     296(2) 
_cell_measurement_reflns_used     25 
_cell_measurement_theta_min       17.29 
_cell_measurement_theta_max       17.45 
 
_exptl_crystal_description        plate 
_exptl_crystal_colour             yellow 
_exptl_crystal_size_max           0.50	 
_exptl_crystal_size_mid           0.45 
_exptl_crystal_size_min           0.30 
_exptl_crystal_density_meas       'not measured' 
_exptl_crystal_density_diffrn     1.711 
_exptl_crystal_density_method     'not measured' 
_exptl_crystal_F_000              3600 
_exptl_absorpt_coefficient_mu     2.206 
_exptl_absorpt_correction_type    psi-scan	 
_exptl_absorpt_correction_T_min   0.8568 
_exptl_absorpt_correction_T_max   1.0000 
 
_exptl_special_details 
; 
 ? 
; 
 
_diffrn_ambient_temperature       296(2) 
_diffrn_radiation_wavelength      0.71069 
_diffrn_radiation_type            MoK\a 
_diffrn_radiation_source          'normal focus rotating anode' 
_diffrn_radiation_monochromator   graphite 
_diffrn_measurement_device_type   'RIGAKU AFC-5R' 
_diffrn_measurement_method        \w 
_diffrn_standards_number          3
_diffrn_standards_interval_count  200 
_diffrn_standards_decay_%         '-8.8 - -19.2' 
_diffrn_reflns_number             20607 
_diffrn_reflns_av_R_equivalents   0.0000 
_diffrn_reflns_av_sigmaI/netI     0.0755 
_diffrn_reflns_limit_h_min        -17 
_diffrn_reflns_limit_h_max        17 
_diffrn_reflns_limit_k_min        0 
_diffrn_reflns_limit_k_max        33 
_diffrn_reflns_limit_l_min        -34 
_diffrn_reflns_limit_l_max        0 
_diffrn_reflns_theta_min          2.67 
_diffrn_reflns_theta_max          30.00 
_reflns_number_total              20607 
_reflns_number_gt                 11153 
_reflns_threshold_expression      >2sigma(I) 
 
_computing_data_collection        TEXSAN 
_computing_cell_refinement        TEXSAN 
_computing_data_reduction         TEXSAN 
_computing_structure_solution     'SHELXS-97 (Sheldrick, 1990)' 
_computing_structure_refinement   'SHELXL-97 (Sheldrick, 1997)' 
_computing_molecular_graphics     ORTEPII 
 
_refine_special_details 
; 
 Refinement of F^2^ against ALL reflections.  The weighted R-factor wR and 
 goodness of fit S are based on F^2^, conventional R-factors R are based 
 on F, with F set to zero for negative F^2^. The threshold expression of 
 F^2^ > 2sigma(F^2^) is used only for calculating R-factors(gt) etc. and is 
 not relevant to the choice of reflections for refinement.  R-factors based 
 on F^2^ are statistically about twice as large as those based on F, and R- 
 factors based on ALL data will be even larger. 
; 
 
_refine_ls_structure_factor_coef  Fsqd  
_refine_ls_matrix_type            full 
_refine_ls_weighting_scheme 
 'calc w=1/[\s^2^(Fo^2^)+(0.0990P)^2^+0.0000P] where P=(Fo^2^+2Fc^2^)/3' 
_atom_sites_solution_primary      direct 
_atom_sites_solution_secondary    difmap 
_refine_ls_extinction_method      none 
_refine_ls_extinction_coef        0 
_refine_ls_number_reflns          20607 
_refine_ls_number_parameters      775 
_refine_ls_number_restraints      0 
_refine_ls_R_factor_all           0.1312 
_refine_ls_R_factor_gt            0.0532 
_refine_ls_wR_factor_ref          0.1830 
_refine_ls_wR_factor_gt           0.1515 
_refine_ls_goodness_of_fit_ref    1.001 
_refine_ls_restrained_S_all       1.001 
_refine_ls_shift/su_max           0.015 
_refine_ls_shift/su_mean          0.002 
 
loop_ 
 _atom_site_label 
 _atom_site_type_symbol 
 _atom_site_fract_x 
 _atom_site_fract_y 
 _atom_site_fract_z 
 _atom_site_U_iso_or_equiv 
 _atom_site_adp_type 
 _atom_site_occupancy 
 _atom_site_calc_flag 
 _atom_site_refinement_flags 
 _atom_site_disorder_assembly 
 _atom_site_disorder_group 
La1 La 0.12445(3) 0.134334(17) 0.277348(19) 0.04837(11) Uani 1 d . . . 
La2 La 0.26708(4) 0.25496(2) 0.462793(17) 0.05247(12) Uani 1 d . . . 
La3 La 0.14149(3) 0.396338(16) 0.245142(18) 0.04669(11) Uani 1 d . . . 
Mo1 Mo 0.34751(4) 0.26275(2) 0.30946(2) 0.03721(12) Uani 1 d . . . 
Mo2 Mo -0.00103(5) 0.27953(3) 0.33093(3) 0.04560(14) Uani 1 d . . . 
C1 C 0.5098(6) 0.3109(3) 0.2979(4) 0.0579(19) Uani 1 d . . . 
C2 C 0.4740(6) 0.2734(4) 0.2507(3) 0.064(2) Uani 1 d . . . 
C3 C 0.4839(6) 0.2176(4) 0.2702(4) 0.070(3) Uani 1 d . . . 
C4 C 0.5229(6) 0.2189(4) 0.3295(4) 0.071(2) Uani 1 d . . . 
C5 C 0.5407(6) 0.2756(4) 0.3463(3) 0.064(2) Uani 1 d . . . 
C6 C 0.5168(9) 0.3741(4) 0.2979(7) 0.111(5) Uani 1 d . . . 
C7 C 0.4336(10) 0.2918(8) 0.1895(5) 0.135(6) Uani 1 d . . . 
C8 C 0.4575(10) 0.1658(6) 0.2338(8) 0.144(7) Uani 1 d . . . 
C9 C 0.5399(10) 0.1652(7) 0.3647(9) 0.173(9) Uani 1 d . . . 
C10 C 0.5855(9) 0.2944(8) 0.4063(5) 0.127(5) Uani 1 d . . . 
C11 C -0.1520(7) 0.2410(5) 0.3635(4) 0.078(3) Uani 1 d . . . 
C12 C -0.1907(6) 0.2472(4) 0.3054(4) 0.067(2) Uani 1 d . . . 
C13 C -0.1915(6) 0.3061(4) 0.2927(4) 0.061(2) Uani 1 d . . . 
C14 C -0.1516(7) 0.3351(4) 0.3429(5) 0.079(3) Uani 1 d . . . 
C15 C -0.1294(7) 0.2954(6) 0.3868(4) 0.087(3) Uani 1 d . . . 
C16 C -0.1363(10) 0.1832(6) 0.3939(6) 0.120(5) Uani 1 d . . . 
C17 C -0.2271(8) 0.1996(5) 0.2633(6) 0.105(4) Uani 1 d . . . 
C18 C -0.2274(8) 0.3333(5) 0.2351(5) 0.095(3) Uani 1 d . . . 
C19 C -0.1410(11) 0.3995(5) 0.3496(7) 0.128(5) Uani 1 d . . . 
C20 C -0.0885(11) 0.3069(9) 0.4508(5) 0.146(7) Uani 1 d . . . 
O1 O 0.2692(4) 0.2030(2) 0.2815(2) 0.0527(12) Uani 1 d . . . 
O2 O 0.3428(4) 0.2643(2) 0.3809(2) 0.0548(12) Uani 1 d . . . 
O3 O 0.2758(4) 0.3229(2) 0.2781(2) 0.0549(12) Uani 1 d . . . 
O4 O 0.0223(4) 0.2150(2) 0.3000(2) 0.0576(12) Uani 1 d . . . 
O5 O 0.0997(4) 0.2835(2) 0.3949(2) 0.0566(12) Uani 1 d . . . 
O6 O 0.0311(4) 0.3339(2) 0.2885(2) 0.0560(12) Uani 1 d . . . 
N11 N 0.1021(7) 0.1843(3) 0.1580(4) 0.078(2) Uani 1 d . . . 
O11 O 0.0523(5) 0.2028(2) 0.1925(2) 0.0651(14) Uani 1 d . . . 
O12 O 0.1560(6) 0.1397(3) 0.1708(3) 0.0847(19) Uani 1 d . . . 
O13 O 0.0951(9) 0.2098(4) 0.1131(4) 0.133(4) Uani 1 d . . . 
N21 N 0.2444(7) 0.0235(3) 0.2669(4) 0.085(2) Uani 1 d . . . 
O21 O 0.1476(5) 0.0246(2) 0.2707(3) 0.0798(19) Uani 1 d . . . 
O22 O 0.2876(6) 0.0704(3) 0.2636(4) 0.114(3) Uani 1 d . . . 
O23 O 0.2922(7) -0.0206(3) 0.2656(6) 0.147(4) Uani 1 d . . . 
N31 N 0.2617(8) 0.1340(4) 0.4049(4) 0.088(3) Uani 1 d . . . 
O31 O 0.1955(5) 0.1705(3) 0.3848(2) 0.0674(14) Uani 1 d . . . 
O32 O 0.2677(9) 0.0922(4) 0.3756(5) 0.158(5) Uani 1 d . . . 
O33 O 0.3234(8) 0.1423(3) 0.4514(4) 0.126(3) Uani 1 d . . . 
N41 N 0.1495(7) 0.1833(3) 0.5362(3) 0.0726(19) Uani 1 d . . . 
O41 O 0.2485(7) 0.1958(3) 0.5550(3) 0.100(2) Uani 1 d . . . 
O42 O 0.1072(6) 0.1999(4) 0.4880(3) 0.108(3) Uani 1 d . . . 
O43 O 0.1017(8) 0.1575(4) 0.5655(3) 0.116(3) Uani 1 d . . . 
N51 N 0.4809(8) 0.2543(5) 0.5517(4) 0.090(3) Uani 1 d . . . 
O51 O 0.4653(7) 0.2268(5) 0.5075(4) 0.126(3) Uani 1 d . . . 
O52 O 0.4073(8) 0.2876(4) 0.5544(4) 0.118(3) Uani 1 d . . . 
O53 O 0.5649(7) 0.2503(5) 0.5902(4) 0.134(4) Uani 1 d . . . 
N61 N 0.2492(8) 0.5119(3) 0.2380(4) 0.084(2) Uani 1 d . . . 
O61 O 0.2995(6) 0.4715(3) 0.2646(3) 0.087(2) Uani 1 d . . . 
O62 O 0.1519(6) 0.5027(2) 0.2124(3) 0.086(2) Uani 1 d . . . 
O63 O 0.2906(8) 0.5585(3) 0.2351(5) 0.130(3) Uani 1 d . . . 
N71 N 0.1584(10) 0.4529(4) 0.3575(4) 0.106(3) Uani 1 d . . . 
O71 O 0.2173(6) 0.4103(3) 0.3530(3) 0.0838(19) Uani 1 d . . . 
O72 O 0.0890(6) 0.4691(3) 0.3145(3) 0.086(2) Uani 1 d . . . 
O73 O 0.1689(13) 0.4762(6) 0.4027(4) 0.215(7) Uani 1 d . . . 
OW1 O -0.0421(5) 0.0913(2) 0.2112(3) 0.0737(17) Uani 1 d . . . 
OW2 O 0.0079(6) 0.0833(3) 0.3354(3) 0.0868(19) Uani 1 d . . . 
OW3 O 0.3229(6) 0.3589(3) 0.4544(3) 0.0797(18) Uani 1 d . . . 
OW4 O 0.1829(6) 0.3211(3) 0.5264(3) 0.090(2) Uani 1 d . . . 
OW5 O 0.0590(5) 0.3194(2) 0.1752(2) 0.0701(15) Uani 1 d . . . 
OW6 O -0.0431(5) 0.4318(2) 0.1928(3) 0.0694(15) Uani 1 d . . . 
OW7 O 0.2206(6) 0.3997(3) 0.1603(3) 0.086(2) Uani 1 d . . . 
O101 O -0.1991(9) 0.1385(5) 0.1332(4) 0.144(4) Uani 1 d . . . 
C101 C -0.3106(14) 0.1183(9) 0.1263(8) 0.165(8) Uani 1 d . . . 
C102 C -0.3460(17) 0.1072(11) 0.0648(8) 0.186(10) Uani 1 d . . . 
C103 C -0.2708(17) 0.1367(11) 0.0398(7) 0.185(10) Uani 1 d . . . 
C104 C -0.1777(19) 0.1535(12) 0.0845(8) 0.250(16) Uani 1 d . . . 
O201 O 0.3254(13) 0.0756(4) 0.0514(4) 0.181(6) Uani 1 d . . . 
C201 C 0.3782(18) 0.0871(9) 0.1071(6) 0.170(8) Uani 1 d . . . 
C202 C 0.417(2) 0.0310(12) 0.1336(9) 0.203(11) Uani 1 d . . . 
C203 C 0.426(4) -0.0022(12) 0.0969(16) 0.34(2) Uani 1 d . . . 
C204 C 0.325(6) 0.0228(12) 0.0425(13) 0.81(8) Uani 1 d . . . 
O301 O -0.1775(10) 0.3861(7) 0.1032(5) 0.181(5) Uani 1 d . . . 
C301 C -0.189(2) 0.3274(11) 0.0813(10) 0.258(15) Uani 1 d . . . 
C302 C -0.2537(18) 0.3292(11) 0.0285(8) 0.170(8) Uani 1 d . . . 
C303 C -0.302(3) 0.3801(13) 0.0230(13) 0.36(3) Uani 1 d . . . 
C304 C -0.272(3) 0.4116(14) 0.0828(13) 0.37(3) Uani 1 d . . . 
O401 O 0.3801(14) 0.4531(7) 0.1303(6) 0.239(9) Uani 1 d . . . 
C401 C 0.4411(17) 0.5006(8) 0.1476(9) 0.186(9) Uani 1 d . . . 
C402 C 0.489(2) 0.5101(11) 0.0976(12) 0.243(14) Uani 1 d . . . 
C403 C 0.447(2) 0.4674(11) 0.0577(10) 0.224(12) Uani 1 d . . . 
C404 C 0.400(3) 0.4276(11) 0.0811(11) 0.283(19) Uani 1 d . . . 
 
loop_ 
 _atom_site_aniso_label 
 _atom_site_aniso_U_11 
 _atom_site_aniso_U_22 
 _atom_site_aniso_U_33 
 _atom_site_aniso_U_23 
 _atom_site_aniso_U_13 
 _atom_site_aniso_U_12 
La1 0.0437(2) 0.04035(19) 0.0612(3) -0.00289(17) 0.01338(18) -0.00633(16) 
La2 0.0546(2) 0.0641(3) 0.0386(2) 0.00380(18) 0.01114(17) 0.00051(19) 
La3 0.0477(2) 0.0416(2) 0.0508(2) 0.00340(16) 0.01224(17) 0.00793(16) 
Mo1 0.0300(2) 0.0405(3) 0.0412(3) -0.0021(2) 0.0090(2) 0.0006(2) 
Mo2 0.0359(3) 0.0561(3) 0.0483(3) 0.0004(3) 0.0170(2) 0.0040(2) 
C1 0.037(3) 0.058(4) 0.084(6) -0.005(4) 0.023(4) -0.006(3) 
C2 0.038(4) 0.104(7) 0.054(4) 0.004(4) 0.020(3) 0.009(4) 
C3 0.041(4) 0.072(5) 0.104(7) -0.037(5) 0.031(4) -0.007(4) 
C4 0.036(4) 0.078(6) 0.102(7) 0.027(5) 0.020(4) 0.015(4) 
C5 0.029(3) 0.103(7) 0.059(5) -0.022(5) 0.008(3) -0.004(4) 
C6 0.084(7) 0.055(5) 0.212(15) -0.006(7) 0.069(9) -0.017(5) 
C7 0.092(9) 0.261(19) 0.060(6) 0.034(9) 0.034(6) 0.033(10) 
C8 0.086(8) 0.123(10) 0.239(18) -0.118(11) 0.072(10) -0.026(7) 
C9 0.074(8) 0.167(14) 0.28(2) 0.162(15) 0.053(10) 0.049(8) 
C10 0.072(7) 0.235(17) 0.065(6) -0.050(9) 0.003(5) -0.030(9) 
C11 0.052(5) 0.112(8) 0.079(6) 0.019(6) 0.035(5) 0.003(5) 
C12 0.037(4) 0.086(6) 0.084(6) -0.007(5) 0.027(4) 0.000(4) 
C13 0.039(4) 0.071(5) 0.076(5) -0.010(4) 0.017(4) 0.006(3) 
C14 0.047(5) 0.082(6) 0.114(8) -0.021(6) 0.032(5) 0.011(4) 
C15 0.045(5) 0.149(10) 0.078(6) -0.025(7) 0.033(4) 0.006(6) 
C16 0.094(8) 0.132(10) 0.151(12) 0.059(9) 0.065(8) 0.002(8) 
C17 0.059(6) 0.091(7) 0.166(12) -0.045(8) 0.031(7) -0.018(5) 
C18 0.065(6) 0.116(9) 0.103(8) 0.031(7) 0.017(6) 0.020(6) 
C19 0.098(9) 0.102(9) 0.190(16) -0.057(9) 0.050(10) 0.013(7) 
C20 0.095(9) 0.28(2) 0.075(7) -0.045(10) 0.038(7) 0.025(11) 
O1 0.041(2) 0.051(3) 0.070(3) -0.014(2) 0.023(2) -0.012(2) 
O2 0.049(3) 0.071(3) 0.046(3) -0.007(2) 0.014(2) -0.005(2) 
O3 0.042(3) 0.055(3) 0.071(3) 0.011(2) 0.018(2) 0.011(2) 
O4 0.042(3) 0.065(3) 0.067(3) -0.006(3) 0.016(2) 0.002(2) 
O5 0.049(3) 0.072(3) 0.049(3) -0.005(2) 0.012(2) 0.003(2) 
O6 0.046(3) 0.063(3) 0.061(3) 0.011(2) 0.017(2) 0.004(2) 
N11 0.099(6) 0.062(4) 0.086(6) -0.012(4) 0.045(5) -0.014(4) 
O11 0.083(4) 0.058(3) 0.062(3) 0.000(3) 0.032(3) -0.007(3) 
O12 0.083(5) 0.076(4) 0.102(5) -0.022(4) 0.035(4) 0.005(3) 
O13 0.226(11) 0.111(6) 0.096(6) 0.024(5) 0.105(7) 0.017(7) 
N21 0.075(5) 0.048(4) 0.129(7) -0.007(4) 0.019(5) 0.004(4) 
O21 0.063(4) 0.044(3) 0.124(6) 0.001(3) 0.007(4) -0.008(3) 
O22 0.093(5) 0.055(4) 0.214(10) 0.005(5) 0.073(6) 0.003(4) 
O23 0.096(6) 0.054(4) 0.283(14) -0.020(6) 0.033(7) 0.013(4) 
N31 0.099(6) 0.077(5) 0.072(5) -0.017(4) -0.009(5) 0.010(5) 
O31 0.065(4) 0.069(4) 0.067(3) 0.011(3) 0.014(3) 0.007(3) 
O32 0.159(9) 0.099(6) 0.164(9) -0.057(6) -0.058(7) 0.058(6) 
O33 0.145(8) 0.091(5) 0.104(6) -0.010(5) -0.038(6) 0.033(5) 
N41 0.085(6) 0.074(5) 0.064(5) 0.011(4) 0.030(4) -0.001(4) 
O41 0.120(7) 0.098(5) 0.076(5) 0.029(4) 0.011(4) 0.004(5) 
O42 0.091(5) 0.162(8) 0.071(4) 0.039(5) 0.018(4) -0.028(5) 
O43 0.165(8) 0.112(6) 0.089(5) 0.012(5) 0.066(6) -0.027(6) 
N51 0.068(5) 0.122(8) 0.069(5) 0.006(5) -0.006(4) -0.008(5) 
O51 0.073(5) 0.185(10) 0.109(7) -0.019(7) 0.002(5) 0.031(6) 
O52 0.106(7) 0.121(7) 0.097(6) -0.016(5) -0.029(5) 0.005(5) 
O53 0.079(6) 0.207(10) 0.096(6) 0.003(6) -0.014(5) -0.007(6) 
N61 0.100(7) 0.052(4) 0.116(7) -0.003(4) 0.060(6) -0.008(4) 
O61 0.076(4) 0.062(4) 0.119(6) 0.004(4) 0.018(4) -0.009(3) 
O62 0.091(5) 0.045(3) 0.121(6) 0.012(3) 0.025(4) 0.000(3) 
O63 0.139(8) 0.058(4) 0.206(10) -0.006(5) 0.065(7) -0.023(5) 
N71 0.154(10) 0.086(6) 0.075(6) -0.029(5) 0.023(6) 0.007(6) 
O71 0.107(5) 0.072(4) 0.067(4) -0.002(3) 0.013(4) 0.011(4) 
O72 0.113(6) 0.072(4) 0.067(4) -0.013(3) 0.012(4) 0.028(4) 
O73 0.314(18) 0.210(13) 0.088(7) -0.075(8) -0.013(9) 0.080(12) 
OW1 0.057(3) 0.066(3) 0.086(4) 0.004(3) -0.006(3) -0.017(3) 
OW2 0.092(5) 0.080(4) 0.096(5) -0.001(4) 0.038(4) -0.026(4) 
OW3 0.112(5) 0.063(4) 0.062(4) -0.001(3) 0.017(3) -0.008(3) 
OW4 0.107(5) 0.103(5) 0.071(4) -0.009(4) 0.040(4) 0.014(4) 
OW5 0.094(4) 0.059(3) 0.061(3) -0.003(3) 0.027(3) -0.001(3) 
OW6 0.059(3) 0.059(3) 0.078(4) 0.000(3) -0.006(3) 0.011(3) 
OW7 0.109(5) 0.089(5) 0.072(4) -0.004(3) 0.049(4) -0.016(4) 
O101 0.125(8) 0.173(10) 0.110(7) 0.022(7) -0.014(6) -0.004(7) 
C101 0.107(12) 0.22(2) 0.145(15) 0.041(13) -0.020(11) -0.023(12) 
C102 0.152(17) 0.26(3) 0.115(14) -0.044(15) -0.024(12) 0.053(17) 
C103 0.143(16) 0.30(3) 0.101(12) 0.046(14) 0.018(11) -0.072(17) 
C104 0.20(2) 0.39(4) 0.126(14) 0.13(2) -0.034(14) -0.13(2) 
O201 0.317(17) 0.094(7) 0.106(7) 0.016(6) -0.001(9) -0.039(9) 
C201 0.24(2) 0.170(16) 0.083(10) 0.011(10) 0.010(12) 0.073(16) 
C202 0.28(3) 0.19(2) 0.124(16) -0.025(15) 0.014(17) 0.03(2) 
C203 0.61(7) 0.16(2) 0.25(4) 0.06(2) 0.10(4) 0.15(3) 
C204 1.8(2) 0.13(2) 0.19(3) 0.054(19) -0.33(6) -0.25(6) 
O301 0.123(9) 0.243(14) 0.143(10) -0.085(10) -0.032(7) -0.018(9) 
C301 0.31(3) 0.22(2) 0.164(19) -0.045(18) -0.10(2) -0.07(2) 
C302 0.172(19) 0.22(2) 0.123(14) -0.067(15) 0.045(14) -0.030(17) 
C303 0.41(5) 0.24(3) 0.25(3) -0.06(3) -0.24(3) 0.04(3) 
C304 0.29(3) 0.35(4) 0.32(4) -0.21(3) -0.19(3) 0.19(3) 
O401 0.310(19) 0.267(17) 0.194(13) -0.083(12) 0.163(14) -0.183(15) 
C401 0.201(19) 0.173(16) 0.21(2) -0.078(15) 0.101(16) -0.125(15) 
C402 0.28(3) 0.24(3) 0.26(3) -0.08(2) 0.17(3) -0.16(2) 
C403 0.31(3) 0.22(2) 0.20(2) -0.063(19) 0.15(2) -0.10(2) 
C404 0.47(4) 0.23(2) 0.26(3) -0.13(2) 0.29(3) -0.20(3) 
 
_geom_special_details 
; 
 All esds (except the esd in the dihedral angle between two l.s. planes) 
 are estimated using the full covariance matrix.  The cell esds are taken 
 into account individually in the estimation of esds in distances, angles 
 and torsion angles; correlations between esds in cell parameters are only 
 used when they are defined by crystal symmetry.  An approximate (isotropic) 
 treatment of cell esds is used for estimating esds involving l.s. planes. 
; 
 
loop_ 
 _geom_bond_atom_site_label_1 
 _geom_bond_atom_site_label_2 
 _geom_bond_distance 
 _geom_bond_site_symmetry_2 
 _geom_bond_publ_flag 
La1 O1 2.426(4) . yes 
La1 O4 2.437(5) . yes 
La1 OW1 2.531(5) . no 
La1 OW2 2.584(6) . no 
La1 O21 2.610(6) . no 
La1 O11 2.612(6) . no 
La1 O22 2.644(7) . no 
La1 O31 2.703(6) . no 
La1 O12 2.743(7) . no 
La1 O32 2.813(9) . no 
La1 Mo1 4.0780(12) . yes 
La1 Mo2 4.1195(10) . yes 
La1 La2 5.2872(14) . yes 
La1 La3 6.2320(14) . yes 
La1 La3 6.4903(14) 2_545 no 
La2 O2 2.439(5) . yes 
La2 O5 2.442(5) . yes 
La2 O51 2.563(8) . no 
La2 OW3 2.570(6) . no 
La2 O42 2.602(7) . no 
La2 OW4 2.610(6) . no 
La2 O52 2.611(7) . no 
La2 O41 2.717(7) . no 
La2 O31 2.753(6) . no 
La2 O33 2.779(8) . no 
La2 Mo2 4.1077(19) . yes 
La2 Mo1 4.1348(12) . yes 
La2 La3 6.1574(14) . yes 
La3 O3 2.420(5) . yes 
La3 O6 2.444(5) . yes 
La3 OW6 2.513(5) . no 
La3 OW7 2.522(6) . no 
La3 OW5 2.535(6) . no 
La3 O71 2.602(6) . no 
La3 O72 2.613(6) . no 
La3 O61 2.624(6) . no 
La3 O62 2.644(6) . no 
La3 Mo2 4.1373(11) . yes 
La3 Mo1 4.1409(12) . yes 
La3 La1 6.4903(14) 2 no 
Mo1 O3 1.753(5) . yes 
Mo1 O1 1.760(5) . yes 
Mo1 O2 1.768(5) . yes 
Mo1 C4 2.385(7) . no 
Mo1 C5 2.406(7) . no 
Mo1 C2 2.416(7) . no 
Mo1 C3 2.419(7) . no 
Mo1 C1 2.422(7) . no 
Mo1 Mo2 4.584(2) . no 
Mo2 O4 1.756(5) . yes 
Mo2 O6 1.760(5) . yes 
Mo2 O5 1.763(5) . yes 
Mo2 C14 2.388(8) . no 
Mo2 C15 2.398(8) . no 
Mo2 C11 2.421(8) . no 
Mo2 C13 2.440(8) . no 
Mo2 C12 2.446(8) . no 
C1 C5 1.422(12) . no 
C1 C2 1.436(12) . no 
C1 C6 1.491(12) . no 
C2 C3 1.395(13) . no 
C2 C7 1.525(13) . no 
C3 C4 1.415(14) . no 
C3 C8 1.500(13) . no 
C4 C5 1.400(13) . no 
C4 C9 1.517(14) . no 
C5 C10 1.508(12) . no 
C11 C12 1.395(13) . no 
C11 C15 1.402(15) . no 
C11 C16 1.541(15) . no 
C12 C13 1.422(12) . no 
C12 C17 1.517(14) . no 
C13 C14 1.388(13) . no 
C13 C18 1.515(14) . no 
C14 C15 1.402(15) . no 
C14 C19 1.528(16) . no 
C15 C20 1.551(15) . no 
N11 O13 1.238(10) . no 
N11 O12 1.250(10) . no 
N11 O11 1.252(9) . no 
N21 O23 1.207(10) . no 
N21 O22 1.244(10) . no 
N21 O21 1.251(10) . no 
N31 O31 1.217(10) . no 
N31 O33 1.228(10) . no 
N31 O32 1.233(11) . no 
N41 O43 1.211(10) . no 
N41 O42 1.236(10) . no 
N41 O41 1.258(10) . no 
N51 O52 1.232(12) . no 
N51 O51 1.235(12) . no 
N51 O53 1.238(11) . no 
N61 O63 1.226(10) . no 
N61 O61 1.238(10) . no 
N61 O62 1.254(11) . no 
N71 O73 1.216(11) . no 
N71 O72 1.254(11) . no 
N71 O71 1.271(11) . no 
OW3 O71 2.792(9) . yes
OW5 O11 2.785(8) . yes
O101 C104 1.34(2) . no 
O101 C101 1.458(19) . no 
C101 C102 1.49(2) . no 
C102 C103 1.43(3) . no 
C103 C104 1.45(2) . no 
O201 C204 1.26(3) . no 
O201 C201 1.391(18) . no 
C201 C202 1.50(3) . no 
C202 C203 1.22(3) . no 
C203 C204 1.71(5) . no 
O301 C304 1.32(2) . no 
O301 C301 1.48(3) . no 
C301 C302 1.35(3) . no 
C302 C303 1.33(3) . no 
C303 C304 1.60(4) . no 
O401 C401 1.365(17) . no 
O401 C404 1.42(2) . no 
C401 C402 1.51(3) . no 
C402 C403 1.41(3) . no 
C403 C404 1.31(3) . no 
 
loop_ 
 _geom_angle_atom_site_label_1 
 _geom_angle_atom_site_label_2 
 _geom_angle_atom_site_label_3 
 _geom_angle 
 _geom_angle_site_symmetry_1 
 _geom_angle_site_symmetry_3 
 _geom_angle_publ_flag 
O1 La1 O4 84.74(17) . . no 
O1 La1 OW1 142.50(19) . . no 
O4 La1 OW1 93.09(19) . . no 
O1 La1 OW2 144.5(2) . . no 
O4 La1 OW2 80.2(2) . . no 
OW1 La1 OW2 70.7(2) . . no 
O1 La1 O21 124.55(18) . . no 
O4 La1 O21 149.3(2) . . no 
OW1 La1 O21 69.7(2) . . no 
OW2 La1 O21 70.2(2) . . no 
O1 La1 O11 74.54(18) . . no 
O4 La1 O11 66.42(18) . . no 
OW1 La1 O11 70.40(18) . . no 
OW2 La1 O11 126.2(2) . . no 
O21 La1 O11 125.7(2) . . no 
O1 La1 O22 77.31(19) . . no 
O4 La1 O22 161.4(2) . . no 
OW1 La1 O22 104.0(2) . . no 
OW2 La1 O22 112.0(2) . . no 
O21 La1 O22 47.5(2) . . no 
O11 La1 O22 112.4(2) . . no 
O1 La1 O31 71.54(18) . . no 
O4 La1 O31 66.38(18) . . no 
OW1 La1 O31 140.8(2) . . no 
OW2 La1 O31 73.0(2) . . no 
O21 La1 O31 111.0(2) . . no 
O11 La1 O31 123.25(17) . . no 
O22 La1 O31 102.8(3) . . no 
O1 La1 O12 73.95(19) . . no 
O4 La1 O12 113.07(19) . . no 
OW1 La1 O12 72.6(2) . . no 
OW2 La1 O12 141.5(2) . . no 
O21 La1 O12 86.6(2) . . no 
O11 La1 O12 46.94(19) . . no 
O22 La1 O12 66.6(3) . . no 
O31 La1 O12 145.39(19) . . no 
O1 La1 O32 83.1(3) . . no 
O4 La1 O32 110.2(2) . . no 
OW1 La1 O32 131.8(3) . . no 
OW2 La1 O32 72.4(3) . . no 
O21 La1 O32 69.3(2) . . no 
O11 La1 O32 157.5(3) . . no 
O22 La1 O32 63.3(3) . . no 
O31 La1 O32 44.6(2) . . no 
O12 La1 O32 128.2(3) . . no 
Mo1 La1 Mo2 67.99(3) . . no 
Mo1 La1 La2 50.398(19) . . no 
Mo2 La1 La2 49.91(2) . . no 
Mo1 La1 La3 41.067(17) . . no 
Mo2 La1 La3 41.102(16) . . no 
La2 La1 La3 64.009(14) . . no 
O1 La1 La3 161.65(11) . 2_545 no 
O4 La1 La3 113.55(12) . 2_545 no 
Mo1 La1 La3 167.497(13) . 2_545 no 
Mo2 La1 La3 120.78(3) . 2_545 no 
La2 La1 La3 126.638(16) . 2_545 no 
La3 La1 La3 151.394(15) . 2_545 no 
O2 La2 O5 82.22(17) . . no 
O2 La2 O51 80.5(3) . . no 
O5 La2 O51 162.7(3) . . no 
O2 La2 OW3 71.13(19) . . no 
O5 La2 OW3 83.8(2) . . no 
O51 La2 OW3 91.2(3) . . no 
O2 La2 O42 136.6(2) . . no 
O5 La2 O42 72.8(2) . . no 
O51 La2 O42 120.3(3) . . no 
OW3 La2 O42 137.6(3) . . no 
O2 La2 OW4 137.7(2) . . no 
O5 La2 OW4 80.2(2) . . no 
O51 La2 OW4 113.5(3) . . no 
OW3 La2 OW4 68.9(2) . . no 
O42 La2 OW4 72.5(3) . . no 
O2 La2 O52 111.1(3) . . no 
O5 La2 O52 142.7(3) . . no 
O51 La2 O52 47.4(3) . . no 
OW3 La2 O52 69.3(3) . . no 
O42 La2 O52 110.2(3) . . no 
OW4 La2 O52 66.5(3) . . no 
O2 La2 O41 149.8(2) . . no 
O5 La2 O41 118.1(2) . . no 
O51 La2 O41 77.7(3) . . no 
OW3 La2 O41 129.6(2) . . no 
O42 La2 O41 46.7(2) . . no 
OW4 La2 O41 71.1(2) . . no 
O52 La2 O41 67.3(3) . . no 
O2 La2 O31 67.79(17) . . no 
O5 La2 O31 69.17(17) . . no 
O51 La2 O31 103.3(3) . . no 
OW3 La2 O31 133.03(18) . . no 
O42 La2 O31 70.3(2) . . no 
OW4 La2 O31 137.2(2) . . no 
O52 La2 O31 148.0(2) . . no 
O41 La2 O31 97.3(2) . . no 
O2 La2 O33 80.9(3) . . no 
O5 La2 O33 113.3(2) . . no 
O51 La2 O33 63.1(3) . . no 
OW3 La2 O33 145.0(3) . . no 
O42 La2 O33 77.4(3) . . no 
OW4 La2 O33 141.4(3) . . no 
O52 La2 O33 103.4(3) . . no 
O41 La2 O33 70.8(3) . . no 
O31 La2 O33 44.7(2) . . no 
Mo2 La2 Mo1 67.57(3) . . no 
Mo2 La2 La1 50.11(2) . . no 
Mo1 La2 La1 49.457(18) . . no 
Mo2 La2 La3 41.870(18) . . no 
Mo1 La2 La3 41.962(16) . . no 
La1 La2 La3 65.47(2) . . no 
O3 La3 O6 81.58(17) . . no 
O3 La3 OW6 153.55(18) . . no 
O6 La3 OW6 82.18(19) . . no 
O3 La3 OW7 84.8(2) . . no 
O6 La3 OW7 139.7(2) . . no 
OW6 La3 OW7 94.4(2) . . no 
O3 La3 OW5 81.52(19) . . no 
O6 La3 OW5 71.35(18) . . no 
OW6 La3 OW5 73.56(19) . . no 
OW7 La3 OW5 69.2(2) . . no 
O3 La3 O71 72.5(2) . . no 
O6 La3 O71 75.0(2) . . no 
OW6 La3 O71 122.7(2) . . no 
OW7 La3 O71 135.4(2) . . no 
OW5 La3 O71 139.9(2) . . no 
O3 La3 O72 121.5(2) . . no 
O6 La3 O72 81.2(2) . . no 
OW6 La3 O72 76.2(2) . . no 
OW7 La3 O72 137.1(2) . . no 
OW5 La3 O72 141.3(2) . . no 
O71 La3 O72 49.1(2) . . no 
O3 La3 O61 89.0(2) . . no 
O6 La3 O61 144.9(2) . . no 
OW6 La3 O61 116.0(2) . . no 
OW7 La3 O61 71.9(2) . . no 
OW5 La3 O61 140.6(2) . . no 
O71 La3 O61 69.9(2) . . no 
O72 La3 O61 75.2(2) . . no 
O3 La3 O62 134.1(2) . . no 
O6 La3 O62 141.2(2) . . no 
OW6 La3 O62 68.9(2) . . no 
OW7 La3 O62 70.1(2) . . no 
OW5 La3 O62 121.0(2) . . no 
O71 La3 O62 98.9(2) . . no 
O72 La3 O62 67.4(2) . . no 
O61 La3 O62 47.4(2) . . no 
Mo2 La3 Mo1 67.24(3) . . no 
Mo2 La3 La2 41.50(2) . . no 
Mo1 La3 La2 41.886(17) . . no 
Mo2 La3 La1 40.886(13) . . no 
Mo1 La3 La1 40.313(18) . . no 
La2 La3 La1 50.519(10) . . no 
Mo2 La3 La1 109.63(3) . 2 no 
Mo1 La3 La1 162.320(13) . 2 no 
La2 La3 La1 123.924(16) . 2 no 
La1 La3 La1 146.370(16) . 2 no 
O3 Mo1 O1 107.1(2) . . no 
O3 Mo1 O2 106.1(2) . . no 
O1 Mo1 O2 104.5(2) . . no 
O3 Mo1 C4 142.6(3) . . no 
O1 Mo1 C4 98.0(3) . . no 
O2 Mo1 C4 93.6(3) . . no 
O3 Mo1 C5 115.5(3) . . no 
O1 Mo1 C5 131.9(3) . . no 
O2 Mo1 C5 84.6(3) . . no 
C4 Mo1 C5 34.0(3) . . no 
O3 Mo1 C2 90.1(3) . . no 
O1 Mo1 C2 104.0(3) . . no 
O2 Mo1 C2 141.1(3) . . no 
C4 Mo1 C2 56.6(3) . . no 
C5 Mo1 C2 56.6(3) . . no 
O3 Mo1 C3 121.5(3) . . no 
O1 Mo1 C3 83.2(2) . . no 
O2 Mo1 C3 127.2(3) . . no 
C4 Mo1 C3 34.2(3) . . no 
C5 Mo1 C3 56.4(3) . . no 
C2 Mo1 C3 33.5(3) . . no 
O3 Mo1 C1 86.1(2) . . no 
O1 Mo1 C1 137.7(2) . . no 
O2 Mo1 C1 110.1(3) . . no 
C4 Mo1 C1 57.0(3) . . no 
C5 Mo1 C1 34.3(3) . . no 
C2 Mo1 C1 34.5(3) . . no 
C3 Mo1 C1 56.7(3) . . no 
La1 Mo1 La2 80.15(2) . . no 
La1 Mo1 La3 98.62(3) . . no 
La2 Mo1 La3 96.15(2) . . no 
La1 Mo1 Mo2 56.43(2) . . no 
La2 Mo1 Mo2 55.93(3) . . no 
La3 Mo1 Mo2 56.34(2) . . no 
O4 Mo2 O6 106.7(3) . . no 
O4 Mo2 O5 105.6(2) . . no 
O6 Mo2 O5 105.5(2) . . no 
O4 Mo2 C14 138.7(3) . . no 
O6 Mo2 C14 88.9(3) . . no 
O5 Mo2 C14 106.5(3) . . no 
O4 Mo2 C15 126.2(4) . . no 
O6 Mo2 C15 120.8(4) . . no 
O5 Mo2 C15 85.7(3) . . no 
C14 Mo2 C15 34.1(4) . . no 
O4 Mo2 C11 92.8(3) . . no 
O6 Mo2 C11 141.6(3) . . no 
O5 Mo2 C11 100.4(3) . . no 
C14 Mo2 C11 56.4(4) . . no 
C15 Mo2 C11 33.8(4) . . no 
O4 Mo2 C13 108.1(3) . . no 
O6 Mo2 C13 86.4(3) . . no 
O5 Mo2 C13 139.1(3) . . no 
C14 Mo2 C13 33.4(3) . . no 
C15 Mo2 C13 55.7(3) . . no 
C11 Mo2 C13 55.9(3) . . no 
O4 Mo2 C12 83.0(3) . . no 
O6 Mo2 C12 115.5(3) . . no 
O5 Mo2 C12 133.7(3) . . no 
C14 Mo2 C12 56.0(3) . . no 
C15 Mo2 C12 55.6(3) . . no 
C11 Mo2 C12 33.3(3) . . no 
C13 Mo2 C12 33.8(3) . . no 
La2 Mo2 La1 79.98(2) . . no 
La2 Mo2 La3 96.63(3) . . no 
La1 Mo2 La3 98.01(3) . . no 
La2 Mo2 Mo1 56.50(3) . . no 
La1 Mo2 Mo1 55.574(15) . . no 
La3 Mo2 Mo1 56.42(2) . . no 
C5 C1 C2 106.3(7) . . no 
C5 C1 C6 125.4(10) . . no 
C2 C1 C6 128.3(10) . . no 
C5 C1 Mo1 72.3(4) . . no 
C2 C1 Mo1 72.5(4) . . no 
C6 C1 Mo1 121.3(6) . . no 
C3 C2 C1 108.6(7) . . no 
C3 C2 C7 125.8(11) . . no 
C1 C2 C7 125.6(11) . . no 
C3 C2 Mo1 73.3(4) . . no 
C1 C2 Mo1 73.0(4) . . no 
C7 C2 Mo1 120.4(6) . . no 
C2 C3 C4 108.1(7) . . no 
C2 C3 C8 125.1(12) . . no 
C4 C3 C8 126.7(12) . . no 
C2 C3 Mo1 73.1(4) . . no 
C4 C3 Mo1 71.6(4) . . no 
C8 C3 Mo1 121.3(6) . . no 
C5 C4 C3 108.2(8) . . no 
C5 C4 C9 129.6(13) . . no 
C3 C4 C9 122.1(13) . . no 
C5 C4 Mo1 73.8(4) . . no 
C3 C4 Mo1 74.2(4) . . no 
C9 C4 Mo1 118.2(6) . . no 
C4 C5 C1 108.7(7) . . no 
C4 C5 C10 124.3(11) . . no 
C1 C5 C10 127.0(10) . . no 
C4 C5 Mo1 72.2(4) . . no 
C1 C5 Mo1 73.5(4) . . no 
C10 C5 Mo1 120.4(6) . . no 
C12 C11 C15 107.8(9) . . no 
C12 C11 C16 123.8(11) . . no 
C15 C11 C16 128.4(11) . . no 
C12 C11 Mo2 74.3(5) . . no 
C15 C11 Mo2 72.2(5) . . no 
C16 C11 Mo2 118.2(6) . . no 
C11 C12 C13 107.9(9) . . no 
C11 C12 C17 126.1(10) . . no 
C13 C12 C17 126.0(10) . . no 
C11 C12 Mo2 72.4(5) . . no 
C13 C12 Mo2 72.8(5) . . no 
C17 C12 Mo2 121.2(6) . . no 
C14 C13 C12 107.8(9) . . no 
C14 C13 C18 125.3(9) . . no 
C12 C13 C18 127.0(9) . . no 
C14 C13 Mo2 71.2(5) . . no 
C12 C13 Mo2 73.3(4) . . no 
C18 C13 Mo2 120.4(6) . . no 
C13 C14 C15 108.2(9) . . no 
C13 C14 C19 125.9(11) . . no 
C15 C14 C19 125.7(12) . . no 
C13 C14 Mo2 75.4(5) . . no 
C15 C14 Mo2 73.4(5) . . no 
C19 C14 Mo2 120.4(7) . . no 
C11 C15 C14 108.4(9) . . no 
C11 C15 C20 123.8(13) . . no 
C14 C15 C20 127.9(13) . . no 
C11 C15 Mo2 74.0(5) . . no 
C14 C15 Mo2 72.5(5) . . no 
C20 C15 Mo2 120.1(7) . . no 
Mo1 O1 La1 153.6(3) . . no 
Mo1 O2 La2 158.5(3) . . no 
Mo1 O3 La3 165.6(3) . . no 
Mo2 O4 La1 158.1(3) . . no 
Mo2 O5 La2 155.0(3) . . no 
Mo2 O6 La3 159.2(3) . . no 
O13 N11 O12 123.1(9) . . no 
O13 N11 O11 119.6(9) . . no 
O12 N11 O11 117.2(8) . . no 
N11 O11 La1 100.9(5) . . no 
N11 O12 La1 94.5(5) . . no 
O23 N21 O22 122.1(9) . . no 
O23 N21 O21 121.8(8) . . no 
O22 N21 O21 116.0(7) . . no 
N21 O21 La1 98.8(4) . . no 
N21 O22 La1 97.4(6) . . no 
O31 N31 O33 118.7(8) . . no 
O31 N31 O32 117.5(8) . . no 
O33 N31 O32 123.6(9) . . no 
N31 O31 La1 101.7(5) . . no 
N31 O31 La2 98.8(5) . . no 
La1 O31 La2 151.4(2) . . no 
N31 O32 La1 95.7(6) . . no 
N31 O33 La2 97.2(6) . . no 
O43 N41 O42 124.4(10) . . no 
O43 N41 O41 119.8(9) . . no 
O42 N41 O41 115.7(8) . . no 
N41 O41 La2 95.6(5) . . no 
N41 O42 La2 101.9(6) . . no 
O52 N51 O51 115.0(9) . . no 
O52 N51 O53 121.7(11) . . no 
O51 N51 O53 123.3(12) . . no 
N51 O51 La2 99.6(7) . . no 
N51 O52 La2 97.3(6) . . no 
O63 N61 O61 123.2(11) . . no 
O63 N61 O62 120.4(10) . . no 
O61 N61 O62 116.4(7) . . no 
N61 O61 La3 98.8(6) . . no 
N61 O62 La3 97.4(5) . . no 
O73 N71 O72 121.7(11) . . no 
O73 N71 O71 120.1(12) . . no 
O72 N71 O71 118.1(8) . . no 
N71 O71 La3 96.4(6) . . no 
N71 O72 La3 96.3(5) . . no 
C104 O101 C101 112.7(13) . . no 
O101 C101 C102 102.4(17) . . no 
C103 C102 C101 106.5(18) . . no 
C102 C103 C104 108.0(15) . . no 
O101 C104 C103 107.3(16) . . no 
C204 O201 C201 110.0(17) . . no 
O201 C201 C202 106.4(16) . . no 
C203 C202 C201 109(2) . . no 
C202 C203 C204 100(3) . . no 
O201 C204 C203 103(3) . . no 
C304 O301 C301 106.6(17) . . no 
C302 C301 O301 108(2) . . no 
C303 C302 C301 106(2) . . no 
C302 C303 C304 109(2) . . no 
O301 C304 C303 97(2) . . no 
C401 O401 C404 113.7(14) . . no 
O401 C401 C402 100.2(15) . . no 
C403 C402 C401 107.3(16) . . no 
C404 C403 C402 110(2) . . no 
C403 C404 O401 105.2(18) . . no 
 
_diffrn_measured_fraction_theta_max    0.976 
_diffrn_reflns_theta_full              30.00 
_diffrn_measured_fraction_theta_full   0.976 
_refine_diff_density_max    2.390 
_refine_diff_density_min   -0.849 
_refine_diff_density_rms    0.151 


#===END

 
data_c:\shelx\sx97\yaglm1r 
 
_audit_creation_method            SHELXL-97 
_chemical_name_systematic 
; 
 ? 
; 
_chemical_name_common             'dimeric La6Mo4' 
_chemical_formula_moiety          ? 
_chemical_formula_sum 
 'C32 H64 La3 Mo2 N7 O35' 
_chemical_formula_weight          1715.51 
 
loop_ 
 _atom_type_symbol 
 _atom_type_description 
 _atom_type_scat_dispersion_real 
 _atom_type_scat_dispersion_imag 
 _atom_type_scat_source 
 'La'  'La'  -0.2871   2.4523 
 'International Tables Vol C Tables 4.2.6.8 and 6.1.1.4' 
 'Mo'  'Mo'  -1.6832   0.6857 
 'International Tables Vol C Tables 4.2.6.8 and 6.1.1.4' 
 'O'  'O'   0.0106   0.0060 
 'International Tables Vol C Tables 4.2.6.8 and 6.1.1.4' 
 'N'  'N'   0.0061   0.0033 
 'International Tables Vol C Tables 4.2.6.8 and 6.1.1.4' 
 'C'  'C'   0.0033   0.0016 
 'International Tables Vol C Tables 4.2.6.8 and 6.1.1.4' 
 'H'  'H'   0.0000   0.0000 
 'International Tables Vol C Tables 4.2.6.8 and 6.1.1.4' 
 
_symmetry_cell_setting            triclinic
_symmetry_space_group_name_H-M    P -1 
 
loop_ 
 _symmetry_equiv_pos_as_xyz 
 'x, y, z' 
 '-x, -y, -z' 
 
_cell_length_a                    12.661(3) 
_cell_length_b                    22.168(3) 
_cell_length_c                    11.691(4) 
_cell_angle_alpha                 94.44(2) 
_cell_angle_beta                  115.41(2) 
_cell_angle_gamma                 86.45(2) 
_cell_volume                      2953.5(11) 
_cell_formula_units_Z             2 
_cell_measurement_temperature     296(2) 
_cell_measurement_reflns_used     25 
_cell_measurement_theta_min       17.06 
_cell_measurement_theta_max       17.43 
 
_exptl_crystal_description        block	 
_exptl_crystal_colour             yellow 
_exptl_crystal_size_max           0.40 
_exptl_crystal_size_mid           0.30 
_exptl_crystal_size_min           0.20 
_exptl_crystal_density_meas       'not measured' 
_exptl_crystal_density_diffrn     1.929 
_exptl_crystal_density_method     'not measured' 
_exptl_crystal_F_000              1680 
_exptl_absorpt_coefficient_mu     2.633 
_exptl_absorpt_correction_type    psi-scan 
_exptl_absorpt_correction_T_min   0.9097 
_exptl_absorpt_correction_T_max   1.0000 
 
 
_diffrn_ambient_temperature       296(2) 
_diffrn_radiation_wavelength      0.71069 
_diffrn_radiation_type            MoK\a 
_diffrn_radiation_source          'normal focus rotating anode' 
_diffrn_radiation_monochromator   graphite 
_diffrn_measurement_device_type   'RIGAKU AFC-5R' 
_diffrn_measurement_method        \w-2\q 
_diffrn_standards_number          3 
_diffrn_standards_interval_count  200 
_diffrn_standards_decay_%         '-0.6, -5.5, -7.3' 
_diffrn_reflns_number             26004 
_diffrn_reflns_av_R_equivalents   0.0000 
_diffrn_reflns_av_sigmaI/netI     0.1489 
_diffrn_reflns_limit_h_min        0 
_diffrn_reflns_limit_h_max        20 
_diffrn_reflns_limit_k_min        -35 
_diffrn_reflns_limit_k_max        35 
_diffrn_reflns_limit_l_min        -18 
_diffrn_reflns_limit_l_max        17 
_diffrn_reflns_theta_min          2.52 
_diffrn_reflns_theta_max          35.10 
_reflns_number_total              26004 
_reflns_number_gt                 11631 
_reflns_threshold_expression      >2sigma(I) 
 
_computing_data_collection        TEXSAN 
_computing_cell_refinement        TEXSAN 
_computing_data_reduction         TEXSAN 
_computing_structure_solution     'SHELXS-97 (Sheldrick, 1990)' 
_computing_structure_refinement   'SHELXL-97 (Sheldrick, 1997)' 
_computing_molecular_graphics     ORTEPII 
 
_refine_special_details 
; 
 Refinement of F^2^ against ALL reflections.  The weighted R-factor wR and 
 goodness of fit S are based on F^2^, conventional R-factors R are based 
 on F, with F set to zero for negative F^2^. The threshold expression of 
 F^2^ > 2sigma(F^2^) is used only for calculating R-factors(gt) etc. and is 
 not relevant to the choice of reflections for refinement.  R-factors based 
 on F^2^ are statistically about twice as large as those based on F, and R- 
 factors based on ALL data will be even larger. 
; 
 
_refine_ls_structure_factor_coef  Fsqd  
_refine_ls_matrix_type            full 
_refine_ls_weighting_scheme 
 'calc w=1/[\s^2^(Fo^2^)+(0.0900P)^2^+0.0000P] where P=(Fo^2^+2Fc^2^)/3' 
_atom_sites_solution_primary      direct 
_atom_sites_solution_secondary    difmap 
_refine_ls_extinction_method      none 
_refine_ls_number_reflns          26004 
_refine_ls_number_parameters      730 
_refine_ls_number_restraints      0 
_refine_ls_R_factor_all           0.1907 
_refine_ls_R_factor_gt            0.0584 
_refine_ls_wR_factor_ref          0.2000 
_refine_ls_wR_factor_gt           0.1465 
_refine_ls_goodness_of_fit_ref    0.998 
_refine_ls_restrained_S_all       0.998 
_refine_ls_shift/su_max           0.001 
_refine_ls_shift/su_mean          0.000 
 
loop_ 
 _atom_site_label 
 _atom_site_type_symbol 
 _atom_site_fract_x 
 _atom_site_fract_y 
 _atom_site_fract_z 
 _atom_site_U_iso_or_equiv 
 _atom_site_adp_type 
 _atom_site_occupancy 
 _atom_site_calc_flag 
 _atom_site_refinement_flags 
 _atom_site_disorder_assembly 
 _atom_site_disorder_group 
La1 La 0.56383(3) 0.429954(18) 0.18572(4) 0.02786(9) Uani 1 d . . . 
La2 La 0.66063(4) 0.30183(2) 0.58108(4) 0.02971(9) Uani 1 d . . . 
La3 La 0.62713(4) 0.15493(2) 0.09551(4) 0.03407(10) Uani 1 d . . . 
Mo1 Mo 0.42224(5) 0.27192(3) 0.21288(5) 0.02676(12) Uani 1 d . . . 
Mo2 Mo 0.81126(5) 0.29906(3) 0.33147(6) 0.02771(12) Uani 1 d . . . 
C1 C 0.2357(6) 0.3118(4) 0.1929(9) 0.044(2) Uani 1 d . . . 
C2 C 0.2208(6) 0.2878(4) 0.0711(8) 0.0438(19) Uani 1 d . . . 
C3 C 0.2388(6) 0.2259(4) 0.0764(8) 0.0387(17) Uani 1 d . . . 
C4 C 0.2664(7) 0.2099(4) 0.2009(8) 0.0397(17) Uani 1 d . . . 
C5 C 0.2618(6) 0.2631(4) 0.2729(8) 0.0419(18) Uani 1 d . . . 
C6 C 0.2210(9) 0.3781(5) 0.2278(14) 0.077(4) Uani 1 d . . . 
C7 C 0.1869(9) 0.3247(5) -0.0452(10) 0.065(3) Uani 1 d . . . 
C8 C 0.2302(9) 0.1808(5) -0.0336(10) 0.066(3) Uani 1 d . . . 
C9 C 0.2962(9) 0.1475(5) 0.2510(12) 0.068(3) Uani 1 d . . . 
C10 C 0.2850(9) 0.2679(7) 0.4106(10) 0.071(3) Uani 1 d . . . 
C11 C 0.9799(6) 0.3552(4) 0.3665(8) 0.0398(17) Uani 1 d . . . 
C12 C 0.9645(6) 0.3094(5) 0.2681(8) 0.046(2) Uani 1 d . . . 
C13 C 0.9850(7) 0.2532(5) 0.3227(10) 0.054(2) Uani 1 d . . . 
C14 C 1.0120(6) 0.2640(4) 0.4534(9) 0.047(2) Uani 1 d . . . 
C15 C 1.0091(6) 0.3270(4) 0.4798(7) 0.0404(17) Uani 1 d . . . 
C16 C 0.9718(9) 0.4226(5) 0.3538(12) 0.065(3) Uani 1 d . . . 
C17 C 0.9254(9) 0.3200(7) 0.1298(9) 0.079(4) Uani 1 d . . . 
C18 C 0.9835(10) 0.1932(6) 0.2551(15) 0.089(5) Uani 1 d . . . 
C19 C 1.0353(11) 0.2142(6) 0.5495(15) 0.092(5) Uani 1 d . . . 
C20 C 1.0388(10) 0.3566(6) 0.6091(9) 0.067(3) Uani 1 d . . . 
O1 O 0.4519(5) 0.3406(2) 0.1679(5) 0.0382(12) Uani 1 d . . . 
O2 O 0.5054(5) 0.2728(3) 0.3782(5) 0.0395(12) Uani 1 d . . . 
O3 O 0.4848(5) 0.2133(3) 0.1471(6) 0.0447(14) Uani 1 d . . . 
O4 O 0.7319(5) 0.3634(3) 0.2521(5) 0.0391(12) Uani 1 d . . . 
O5 O 0.7827(5) 0.2972(3) 0.4662(5) 0.0414(13) Uani 1 d . . . 
O6 O 0.7454(5) 0.2359(3) 0.2292(6) 0.0480(15) Uani 1 d . . . 
OW1 O 0.5290(7) 0.3741(3) -0.0255(6) 0.0577(18) Uani 1 d . . . 
OW2 O 0.5248(6) 0.3237(3) 0.6929(6) 0.0507(15) Uani 1 d . . . 
OW3 O 0.7148(7) 0.1253(3) 0.3261(6) 0.066(2) Uani 1 d . . . 
OW4 O 0.7421(7) 0.1667(3) -0.0346(7) 0.0622(19) Uani 1 d . . . 
OW5 O 0.5038(7) 0.0742(3) 0.1198(8) 0.070(2) Uani 1 d . . . 
N11 N 0.5213(6) 0.4183(3) 0.4254(6) 0.0326(12) Uani 1 d . . . 
O11 O 0.6110(4) 0.3919(2) 0.4178(5) 0.0335(11) Uani 1 d . . . 
O12 O 0.4654(5) 0.4564(3) 0.3463(6) 0.0464(14) Uani 1 d . . . 
O13 O 0.4925(6) 0.4041(3) 0.5064(6) 0.0555(17) Uani 1 d . . . 
N21 N 0.6607(7) 0.5489(4) 0.3385(7) 0.0471(17) Uani 1 d . . . 
O21 O 0.7146(6) 0.4987(3) 0.3719(6) 0.0550(17) Uani 1 d . . . 
O22 O 0.5622(6) 0.5477(3) 0.2412(6) 0.0509(15) Uani 1 d . . . 
O23 O 0.6993(7) 0.5964(3) 0.3954(8) 0.070(2) Uani 1 d . . . 
N31 N 0.8656(6) 0.2542(3) 0.8175(6) 0.0421(16) Uani 1 d . . . 
O31 O 0.7627(5) 0.2577(3) 0.8100(5) 0.0505(15) Uani 1 d . . . 
O32 O 0.8805(6) 0.2770(4) 0.7311(6) 0.0586(18) Uani 1 d . . . 
O33 O 0.9451(6) 0.2304(4) 0.9053(7) 0.070(2) Uani 1 d . . . 
N41 N 0.6205(8) 0.1673(4) 0.5541(9) 0.059(2) Uani 1 d . . . 
O41 O 0.7033(6) 0.1900(3) 0.5382(7) 0.0546(16) Uani 1 d . . . 
O42 O 0.5660(6) 0.2023(3) 0.5997(7) 0.0560(17) Uani 1 d . . . 
O43 O 0.5963(11) 0.1166(4) 0.5213(13) 0.124(4) Uani 1 d . . . 
N51 N 0.4611(7) 0.2165(4) -0.1437(8) 0.0513(18) Uani 1 d . . . 
O51 O 0.4513(6) 0.1646(3) -0.1239(6) 0.0548(16) Uani 1 d . . . 
O52 O 0.5459(6) 0.2470(3) -0.0586(7) 0.0540(16) Uani 1 d . . . 
O53 O 0.3929(8) 0.2427(5) -0.2384(8) 0.093(3) Uani 1 d . . . 
N61 N 0.7063(9) 0.0279(4) 0.0349(10) 0.061(2) Uani 1 d . . . 
O61 O 0.7675(7) 0.0591(3) 0.1318(7) 0.0645(19) Uani 1 d . . . 
O62 O 0.6194(7) 0.0544(3) -0.0495(8) 0.071(2) Uani 1 d . . . 
O63 O 0.7254(9) -0.0255(4) 0.0200(10) 0.097(3) Uani 1 d . . . 
O1T O 0.7452(6) 0.3992(3) 0.7068(6) 0.0554(17) Uani 1 d . . . 
C1T C 0.8013(10) 0.4458(5) 0.6727(9) 0.061(3) Uani 1 d . . . 
C2T C 0.9105(10) 0.4630(6) 0.7956(11) 0.071(3) Uani 1 d . . . 
C3T C 0.8776(11) 0.4458(7) 0.8999(11) 0.080(4) Uani 1 d . . . 
C4T C 0.7601(11) 0.4150(6) 0.8352(10) 0.075(3) Uani 1 d . . . 
N71 N 0.3482(15) 0.4946(8) -0.0235(14) 0.040(3) Uani 0.50 d P . . 
N71A N 0.2926(16) 0.4829(9) -0.0589(18) 0.050(4) Uani 0.50 d P . . 
O71 O 0.3423(6) 0.4607(3) 0.0479(6) 0.0577(17) Uani 1 d . . . 
O72 O 0.2891(9) 0.5253(5) -0.1017(9) 0.094(3) Uani 1 d . . . 
O73 O 0.4487(10) 0.4984(6) -0.0106(10) 0.044(3) Uani 0.50 d P . . 
O73A O 0.211(2) 0.4542(10) -0.139(2) 0.136(11) Uani 0.50 d P . . 
O101 O 0.6450(9) 0.0066(4) 0.3210(10) 0.090(3) Uani 1 d . . . 
C101 C 0.5750(18) -0.0202(9) 0.3744(19) 0.123(6) Uani 1 d . . . 
C102 C 0.637(2) -0.0722(13) 0.436(3) 0.190(13) Uani 1 d . . . 
C103 C 0.731(2) -0.0868(8) 0.403(2) 0.137(8) Uani 1 d . . . 
C104 C 0.7216(18) -0.0435(7) 0.308(2) 0.122(6) Uani 1 d . . . 
O201 O 0.8557(9) 0.0721(5) -0.1035(10) 0.100(3) Uani 1 d . . . 
C201 C 0.9751(16) 0.0828(9) -0.0835(18) 0.114(6) Uani 1 d . . . 
C202 C 0.9694(19) 0.0734(15) -0.216(2) 0.188(13) Uani 1 d . . . 
C203 C 0.877(2) 0.0319(15) -0.282(2) 0.203(14) Uani 1 d . . . 
C204 C 0.7939(16) 0.0364(10) -0.2199(17) 0.127(7) Uani 1 d . . . 
 
loop_ 
 _atom_site_aniso_label 
 _atom_site_aniso_U_11 
 _atom_site_aniso_U_22 
 _atom_site_aniso_U_33 
 _atom_site_aniso_U_23 
 _atom_site_aniso_U_13 
 _atom_site_aniso_U_12 
La1 0.03013(19) 0.02733(19) 0.02560(18) 0.00652(14) 0.01060(15) -0.00055(14) 
La2 0.03033(19) 0.0357(2) 0.02319(17) 0.00495(15) 0.01087(15) -0.00186(15) 
La3 0.0378(2) 0.0271(2) 0.0406(2) -0.00121(16) 0.02017(19) -0.00243(16) 
Mo1 0.0223(2) 0.0276(3) 0.0285(3) 0.0026(2) 0.0087(2) -0.0023(2) 
Mo2 0.0218(2) 0.0337(3) 0.0284(3) 0.0049(2) 0.0109(2) 0.0000(2) 
C1 0.023(3) 0.038(4) 0.065(5) -0.013(4) 0.016(3) -0.005(3) 
C2 0.024(3) 0.053(5) 0.048(5) 0.012(4) 0.006(3) -0.008(3) 
C3 0.025(3) 0.046(4) 0.041(4) -0.003(3) 0.011(3) -0.008(3) 
C4 0.034(4) 0.041(4) 0.043(4) 0.007(3) 0.014(3) -0.007(3) 
C5 0.024(3) 0.059(5) 0.044(4) 0.001(4) 0.015(3) -0.004(3) 
C6 0.046(5) 0.044(6) 0.138(12) -0.017(6) 0.040(7) -0.004(4) 
C7 0.052(6) 0.071(7) 0.058(6) 0.027(5) 0.005(5) -0.012(5) 
C8 0.056(6) 0.078(8) 0.064(6) -0.038(6) 0.028(5) -0.030(5) 
C9 0.052(6) 0.054(6) 0.095(8) 0.035(6) 0.023(6) 0.001(5) 
C10 0.049(6) 0.125(11) 0.044(5) -0.013(6) 0.025(5) -0.014(6) 
C11 0.025(3) 0.055(5) 0.041(4) 0.005(4) 0.014(3) -0.010(3) 
C12 0.023(3) 0.080(7) 0.037(4) -0.007(4) 0.016(3) -0.014(4) 
C13 0.027(4) 0.063(6) 0.072(6) -0.015(5) 0.023(4) 0.001(4) 
C14 0.020(3) 0.059(6) 0.060(5) 0.020(4) 0.015(3) 0.006(3) 
C15 0.027(3) 0.055(5) 0.035(4) 0.004(3) 0.009(3) -0.004(3) 
C16 0.047(5) 0.056(6) 0.089(8) 0.009(6) 0.023(5) -0.019(5) 
C17 0.047(5) 0.165(13) 0.032(4) -0.011(6) 0.021(4) -0.041(7) 
C18 0.055(6) 0.062(7) 0.135(12) -0.042(8) 0.037(7) 0.007(5) 
C19 0.067(8) 0.079(9) 0.126(12) 0.059(9) 0.032(8) 0.012(6) 
C20 0.059(6) 0.100(9) 0.037(5) -0.019(5) 0.016(4) -0.020(6) 
O1 0.033(3) 0.038(3) 0.040(3) 0.010(2) 0.009(2) -0.008(2) 
O2 0.030(3) 0.054(3) 0.031(3) 0.009(2) 0.008(2) -0.009(2) 
O3 0.035(3) 0.047(3) 0.052(3) -0.010(3) 0.021(3) 0.000(2) 
O4 0.035(3) 0.049(3) 0.040(3) 0.015(2) 0.021(2) 0.009(2) 
O5 0.033(3) 0.065(4) 0.034(3) 0.015(3) 0.022(2) 0.004(3) 
O6 0.034(3) 0.045(3) 0.062(4) -0.010(3) 0.018(3) -0.014(2) 
OW1 0.103(6) 0.034(3) 0.037(3) 0.001(2) 0.032(4) 0.002(3) 
OW2 0.056(4) 0.058(4) 0.047(3) 0.009(3) 0.031(3) 0.008(3) 
OW3 0.095(6) 0.057(4) 0.040(3) 0.002(3) 0.023(4) 0.002(4) 
OW4 0.070(5) 0.060(4) 0.077(5) 0.007(4) 0.050(4) -0.002(4) 
OW5 0.079(5) 0.039(4) 0.107(6) 0.003(4) 0.052(5) -0.015(3) 
N11 0.040(3) 0.033(3) 0.028(3) 0.004(2) 0.017(3) -0.003(3) 
O11 0.032(3) 0.034(3) 0.033(3) 0.002(2) 0.013(2) 0.002(2) 
O12 0.043(3) 0.054(4) 0.042(3) 0.015(3) 0.018(3) 0.012(3) 
O13 0.066(4) 0.073(5) 0.046(3) 0.010(3) 0.042(3) -0.001(3) 
N21 0.057(5) 0.046(4) 0.042(4) -0.005(3) 0.023(3) -0.012(3) 
O21 0.052(4) 0.045(4) 0.047(3) 0.003(3) 0.002(3) 0.001(3) 
O22 0.053(4) 0.043(3) 0.041(3) 0.007(3) 0.004(3) -0.001(3) 
O23 0.077(5) 0.049(4) 0.084(5) -0.028(4) 0.036(4) -0.020(4) 
N31 0.036(3) 0.058(5) 0.030(3) 0.004(3) 0.012(3) 0.000(3) 
O31 0.039(3) 0.075(5) 0.036(3) 0.018(3) 0.013(2) 0.004(3) 
O32 0.043(3) 0.091(5) 0.042(3) 0.017(3) 0.017(3) 0.003(3) 
O33 0.056(4) 0.088(6) 0.048(4) 0.026(4) 0.004(3) 0.012(4) 
N41 0.074(6) 0.041(4) 0.065(5) -0.003(4) 0.032(5) -0.011(4) 
O41 0.060(4) 0.042(4) 0.067(4) 0.004(3) 0.032(4) 0.002(3) 
O42 0.063(4) 0.050(4) 0.062(4) 0.009(3) 0.033(4) -0.006(3) 
O43 0.138(10) 0.049(5) 0.188(12) -0.018(7) 0.074(9) -0.029(6) 
N51 0.060(5) 0.049(5) 0.052(4) 0.010(4) 0.030(4) 0.004(4) 
O51 0.066(4) 0.047(4) 0.048(4) 0.005(3) 0.019(3) -0.015(3) 
O52 0.054(4) 0.040(3) 0.067(4) 0.001(3) 0.024(3) -0.003(3) 
O53 0.084(6) 0.109(7) 0.067(5) 0.041(5) 0.008(5) -0.006(5) 
N61 0.074(6) 0.041(5) 0.079(6) -0.007(4) 0.044(5) -0.008(4) 
O61 0.065(5) 0.055(4) 0.071(5) -0.006(4) 0.030(4) 0.011(4) 
O62 0.074(5) 0.050(4) 0.084(6) -0.022(4) 0.034(5) -0.006(4) 
O63 0.122(8) 0.039(4) 0.138(9) -0.012(5) 0.068(7) 0.008(5) 
O1T 0.070(4) 0.045(4) 0.043(3) -0.008(3) 0.016(3) -0.018(3) 
C1T 0.070(7) 0.059(6) 0.045(5) 0.001(4) 0.014(5) -0.018(5) 
C2T 0.061(7) 0.085(9) 0.055(6) -0.007(6) 0.012(5) -0.017(6) 
C3T 0.069(8) 0.107(10) 0.051(6) -0.010(6) 0.011(6) -0.033(7) 
C4T 0.074(8) 0.099(10) 0.045(5) -0.024(6) 0.020(5) -0.021(7) 
N71 0.047(9) 0.044(9) 0.027(7) 0.011(6) 0.012(7) 0.004(7) 
N71A 0.043(10) 0.058(11) 0.045(10) -0.005(8) 0.014(8) -0.023(9) 
O71 0.065(4) 0.057(4) 0.043(3) 0.020(3) 0.013(3) 0.003(3) 
O72 0.114(8) 0.098(7) 0.091(6) 0.060(6) 0.061(6) 0.048(6) 
O73 0.044(6) 0.051(7) 0.035(6) 0.016(5) 0.011(5) -0.007(6) 
O73A 0.128(18) 0.109(17) 0.105(16) 0.038(13) -0.028(13) -0.072(15) 
O101 0.121(8) 0.052(5) 0.117(7) 0.036(5) 0.065(6) 0.001(5) 
C101 0.159(18) 0.115(14) 0.137(15) 0.040(12) 0.098(14) -0.008(12) 
C102 0.18(3) 0.19(3) 0.24(3) 0.13(2) 0.12(2) 0.02(2) 
C103 0.149(19) 0.081(12) 0.130(16) 0.025(11) 0.014(14) 0.026(12) 
C104 0.165(18) 0.059(9) 0.169(18) 0.014(10) 0.097(15) 0.006(10) 
O201 0.090(7) 0.099(7) 0.114(8) -0.025(6) 0.049(6) -0.007(6) 
C201 0.097(12) 0.130(15) 0.123(14) 0.001(12) 0.056(11) -0.005(11) 
C202 0.118(17) 0.31(4) 0.16(2) -0.07(2) 0.091(17) -0.07(2) 
C203 0.16(2) 0.31(4) 0.15(2) -0.13(2) 0.086(18) -0.06(2) 
C204 0.113(14) 0.18(2) 0.103(13) -0.033(13) 0.067(11) -0.038(13) 
 
_geom_special_details 
; 
 All esds (except the esd in the dihedral angle between two l.s. planes) 
 are estimated using the full covariance matrix.  The cell esds are taken 
 into account individually in the estimation of esds in distances, angles 
 and torsion angles; correlations between esds in cell parameters are only 
 used when they are defined by crystal symmetry.  An approximate (isotropic) 
 treatment of cell esds is used for estimating esds involving l.s. planes. 
; 
 
loop_ 
 _geom_bond_atom_site_label_1 
 _geom_bond_atom_site_label_2 
 _geom_bond_distance 
 _geom_bond_site_symmetry_2 
 _geom_bond_publ_flag 
La1 O4 2.382(5) . yes 
La1 O1 2.452(5) . yes 
La1 OW1 2.546(6) . no 
La1 O73 2.633(11) 2_665 no 
La1 O22 2.642(6) . no 
La1 O71 2.642(7) . no 
La1 O21 2.643(6) . no 
La1 O73 2.663(11) . no 
La1 O12 2.677(6) . no 
La1 O11 2.708(5) . no 
La1 O72 2.714(10) 2_665 no 
La1 Mo2 4.0244(13) . yes 
La1 Mo1 4.1263(10) . yes 
La1 La1 5.1534(16) 2_665 yes 
La1 La2 5.2605(15) . yes 
La1 La3 6.1684(11) . yes 
La2 O2 2.413(5) . yes 
La2 O5 2.438(5) . yes 
La2 O1T 2.532(6) . no 
La2 O41 2.562(6) . no 
La2 OW2 2.575(6) . no 
La2 O32 2.626(6) . no 
La2 O42 2.641(7) . no 
La2 O31 2.659(6) . no 
La2 O11 2.725(5) . no 
La2 O13 2.923(7) . no 
La2 Mo1 4.0909(15) . yes 
La2 Mo2 4.1098(11) . yes 
La2 La3 6.1850(17) . yes 
La3 O6 2.407(6) . yes 
La3 O3 2.410(5) . yes 
La3 OW4 2.551(7) . no 
La3 OW5 2.555(7) . no 
La3 OW3 2.559(7) . no 
La3 O51 2.590(7) . no 
La3 O61 2.623(7) . no 
La3 O62 2.674(7) . no 
La3 O52 2.681(7) . no 
La3 Mo1 4.1243(11) . yes 
La3 Mo2 4.1584(14) . yes 
Mo1 O2 1.759(5) . yes 
Mo1 O1 1.759(5) . yes 
Mo1 O3 1.774(6) . yes 
Mo1 C1 2.391(8) . no 
Mo1 C2 2.393(8) . no 
Mo1 C3 2.417(7) . no 
Mo1 C4 2.423(8) . no 
Mo1 C5 2.439(7) . no 
Mo1 Mo2 4.5741(15) . no 
Mo2 O5 1.765(5) . yes 
Mo2 O6 1.765(6) . yes 
Mo2 O4 1.770(5) . yes 
Mo2 C12 2.383(7) . no 
Mo2 C11 2.403(7) . no 
Mo2 C13 2.405(8) . no 
Mo2 C14 2.432(7) . no 
Mo2 C15 2.443(7) . no 
C1 C5 1.413(13) . no 
C1 C2 1.419(12) . no 
C1 C6 1.518(13) . no 
C2 C3 1.379(12) . no 
C2 C7 1.526(13) . no 
C3 C4 1.413(11) . no 
C3 C8 1.536(12) . no 
C4 C5 1.407(12) . no 
C4 C9 1.506(13) . no 
C5 C10 1.504(13) . no 
C11 C15 1.400(11) . no 
C11 C12 1.429(12) . no 
C11 C16 1.505(14) . no 
C12 C13 1.403(14) . no 
C12 C17 1.507(13) . no 
C13 C14 1.419(14) . no 
C13 C18 1.490(14) . no 
C14 C15 1.409(13) . no 
C14 C19 1.560(15) . no 
C15 C20 1.498(12) . no 
O1 OW1 2.977(8) . no 
O3 OW5 3.081(9) . no 
O6 OW3 2.893(10) . no 
OW1 O52 2.822(9) . yes 
OW1 O73 2.838(14) 2_665 no 
OW1 O73 2.896(14) . no 
OW1 O22 2.937(8) 2_665 no 
OW2 O13 2.800(9) . no 
OW2 O53 2.899(11) 1_556 no 
OW2 O42 2.926(10) . no 
OW2 O31 3.053(9) . no 
OW2 O23 3.065(10) 2_666 no 
OW3 O101 2.816(11) . no 
OW3 O41 2.821(10) . yes 
OW3 O61 2.902(10) . no 
OW3 OW5 2.942(11) . no 
OW4 O201 2.735(12) . no 
OW4 O52 2.890(10) . no 
OW4 O31 2.912(9) 1_554 no 
OW4 O62 2.969(11) . no 
OW5 O101 2.753(12) . no 
OW5 O63 2.881(13) 2_655 no 
OW5 O62 2.921(11) . no 
N11 O13 1.219(8) . no 
N11 O12 1.247(8) . no 
N11 O11 1.280(8) . no 
N21 O23 1.210(9) . no 
N21 O21 1.265(10) . no 
N21 O22 1.278(9) . no 
O22 OW1 2.937(8) 2_665 no 
O23 OW2 3.065(10) 2_666 no 
N31 O33 1.215(9) . no 
N31 O32 1.253(9) . no 
N31 O31 1.265(9) . no 
O31 OW4 2.912(9) 1_556 no 
N41 O43 1.174(11) . no 
N41 O42 1.246(11) . no 
N41 O41 1.278(11) . no 
N51 O51 1.214(10) . no 
N51 O53 1.235(10) . no 
N51 O52 1.291(10) . no 
O53 OW2 2.899(11) 1_554 no 
N61 O63 1.209(11) . no 
N61 O61 1.246(11) . no 
N61 O62 1.268(12) . no 
O63 OW5 2.881(13) 2_655 no 
O1T C4T 1.448(12) . no 
O1T C1T 1.458(12) . no 
C1T C2T 1.548(14) . no 
C2T C3T 1.528(17) . no 
C3T C4T 1.527(16) . no 
N71 O72 1.142(16) . no 
N71 O71 1.194(16) . no 
N71 O73 1.22(2) . no 
N71 O73A 1.90(2) . no 
N71A O72 1.09(2) . no 
N71A O73A 1.22(2) . no 
N71A O71 1.26(2) . no 
N71A O73 1.855(19) . no 
O73 La1 2.633(11) 2_665 no 
O73 OW1 2.838(14) 2_665 no 
O101 C101 1.458(17) . no 
O101 C104 1.471(18) . no 
C101 C102 1.41(3) . no 
C102 C103 1.41(3) . no 
C103 C104 1.49(3) . no 
O201 C204 1.444(19) . no 
O201 C201 1.458(18) . no 
C201 C202 1.52(3) . no 
C202 C203 1.43(3) . no 
C203 C204 1.52(3) . no 
 
loop_ 
 _geom_angle_atom_site_label_1 
 _geom_angle_atom_site_label_2 
 _geom_angle_atom_site_label_3 
 _geom_angle 
 _geom_angle_site_symmetry_1 
 _geom_angle_site_symmetry_3 
 _geom_angle_publ_flag 
O4 La1 O1 86.37(19) . . no 
O4 La1 OW1 80.1(2) . . no 
O1 La1 OW1 73.1(2) . . no 
O4 La1 O73 113.0(3) . 2_665 no 
O1 La1 O73 130.2(3) . 2_665 no 
OW1 La1 O73 66.4(3) . 2_665 no 
O4 La1 O22 126.2(2) . . no 
O1 La1 O22 140.1(2) . . no 
OW1 La1 O22 128.98(19) . . no 
O73 La1 O22 63.1(3) 2_665 . no 
O4 La1 O71 154.8(2) . . no 
O1 La1 O71 74.1(2) . . no 
OW1 La1 O71 79.1(2) . . no 
O22 La1 O71 78.5(2) . . no 
O4 La1 O21 80.3(2) . . no 
O1 La1 O21 136.4(2) . . no 
OW1 La1 O21 142.8(2) . . no 
O73 La1 O21 93.0(3) 2_665 . no 
O22 La1 O21 48.48(19) . . no 
O71 La1 O21 124.9(2) . . no 
O4 La1 O73 136.0(3) . . no 
O1 La1 O73 110.4(3) . . no 
OW1 La1 O73 67.5(3) . . no 
O22 La1 O73 64.4(3) . . no 
O71 La1 O73 44.3(3) . . no 
O21 La1 O73 107.9(3) . . no 
O4 La1 O12 117.93(17) . . no 
O1 La1 O12 75.5(2) . . no 
OW1 La1 O12 142.5(2) . . no 
O73 La1 O12 124.1(3) 2_665 . no 
O22 La1 O12 69.0(2) . . no 
O71 La1 O12 72.8(2) . . no 
O21 La1 O12 74.7(2) . . no 
O73 La1 O12 105.8(3) . . no 
O4 La1 O11 70.62(16) . . no 
O1 La1 O11 69.09(17) . . no 
OW1 La1 O11 132.93(17) . . no 
O73 La1 O11 159.6(3) 2_665 . no 
O22 La1 O11 98.09(17) . . no 
O71 La1 O11 114.95(18) . . no 
O21 La1 O11 67.33(19) . . no 
O73 La1 O11 153.1(3) . . no 
O12 La1 O11 47.37(16) . . no 
O4 La1 O72 73.8(2) . 2_665 no 
O1 La1 O72 142.5(3) . 2_665 no 
OW1 La1 O72 72.4(3) . 2_665 no 
O73 La1 O72 42.0(3) 2_665 2_665 no 
O22 La1 O72 75.2(3) . 2_665 no 
O21 La1 O72 71.9(3) . 2_665 no 
O12 La1 O72 141.9(3) . 2_665 no 
O11 La1 O72 129.1(2) . 2_665 no 
Mo2 La1 Mo1 68.26(2) . . no 
Mo2 La1 La1 136.11(2) . 2_665 no 
Mo1 La1 La1 130.22(2) . 2_665 no 
Mo2 La1 La2 50.419(18) . . no 
Mo1 La1 La2 49.90(2) . . no 
La1 La1 La2 173.402(14) 2_665 . no 
Mo2 La1 La3 41.902(19) . . no 
Mo1 La1 La3 41.602(14) . . no 
La1 La1 La3 120.05(2) 2_665 . no 
La2 La1 La3 64.96(2) . . no 
O2 La2 O5 84.93(19) . . no 
O2 La2 O1T 137.3(2) . . no 
O5 La2 O1T 94.3(2) . . no 
O2 La2 O41 74.5(2) . . no 
O5 La2 O41 72.3(2) . . no 
O1T La2 O41 145.5(2) . . no 
O2 La2 OW2 94.8(2) . . no 
O5 La2 OW2 171.2(2) . . no 
O1T La2 OW2 79.9(2) . . no 
O41 La2 OW2 116.2(2) . . no 
O2 La2 O32 142.4(2) . . no 
O5 La2 O32 68.65(19) . . no 
O1T La2 O32 73.3(2) . . no 
O41 La2 O32 72.3(2) . . no 
OW2 La2 O32 115.4(2) . . no 
O2 La2 O42 70.3(2) . . no 
O5 La2 O42 119.7(2) . . no 
O1T La2 O42 140.5(2) . . no 
O41 La2 O42 48.7(2) . . no 
OW2 La2 O42 68.2(2) . . no 
O32 La2 O42 99.4(2) . . no 
O2 La2 O31 136.6(2) . . no 
O5 La2 O31 114.71(18) . . no 
O1T La2 O31 82.1(2) . . no 
O41 La2 O31 75.7(2) . . no 
OW2 La2 O31 71.3(2) . . no 
O32 La2 O31 47.78(19) . . no 
O42 La2 O31 66.3(2) . . no 
O2 La2 O11 69.70(17) . . no 
O5 La2 O11 66.21(17) . . no 
O1T La2 O11 71.02(18) . . no 
O41 La2 O11 126.45(19) . . no 
OW2 La2 O11 105.40(18) . . no 
O32 La2 O11 118.61(19) . . no 
O42 La2 O11 138.73(19) . . no 
O31 La2 O11 152.96(19) . . no 
O2 La2 O13 72.9(2) . . no 
O5 La2 O13 110.86(17) . . no 
O1T La2 O13 67.5(2) . . no 
O41 La2 O13 146.8(2) . . no 
OW2 La2 O13 60.83(18) . . no 
O32 La2 O13 140.7(2) . . no 
O42 La2 O13 112.5(2) . . no 
O31 La2 O13 126.30(18) . . no 
O11 La2 O13 44.65(15) . . no 
Mo1 La2 Mo2 67.80(2) . . no 
Mo1 La2 La1 50.49(2) . . no 
Mo2 La2 La1 48.999(18) . . no 
Mo1 La2 La3 41.364(19) . . no 
Mo2 La2 La3 41.879(17) . . no 
La1 La2 La3 64.633(18) . . no 
O6 La3 O3 79.4(2) . . no 
O6 La3 OW4 84.0(2) . . no 
O3 La3 OW4 137.4(2) . . no 
O6 La3 OW5 135.7(2) . . no 
O3 La3 OW5 76.6(2) . . no 
OW4 La3 OW5 137.1(2) . . no 
O6 La3 OW3 71.2(2) . . no 
O3 La3 OW3 85.4(2) . . no 
OW4 La3 OW3 125.5(3) . . no 
OW5 La3 OW3 70.2(3) . . no 
O6 La3 O51 126.6(2) . . no 
O3 La3 O51 77.2(2) . . no 
OW4 La3 O51 81.9(2) . . no 
OW5 La3 O51 83.2(2) . . no 
OW3 La3 O51 151.1(2) . . no 
O6 La3 O61 106.1(2) . . no 
O3 La3 O61 148.6(2) . . no 
OW4 La3 O61 73.8(2) . . no 
OW5 La3 O61 78.6(2) . . no 
OW3 La3 O61 68.1(2) . . no 
O51 La3 O61 118.6(2) . . no 
O6 La3 O62 146.2(2) . . no 
O3 La3 O62 134.3(2) . . no 
OW4 La3 O62 69.2(3) . . no 
OW5 La3 O62 67.9(3) . . no 
OW3 La3 O62 107.6(3) . . no 
O51 La3 O62 71.0(2) . . no 
O61 La3 O62 47.8(2) . . no 
O6 La3 O52 79.0(2) . . no 
O3 La3 O52 71.4(2) . . no 
OW4 La3 O52 67.0(2) . . no 
OW5 La3 O52 125.9(2) . . no 
OW3 La3 O52 145.1(2) . . no 
O51 La3 O52 48.1(2) . . no 
O61 La3 O52 139.8(2) . . no 
O62 La3 O52 107.3(2) . . no 
Mo1 La3 Mo2 67.04(2) . . no 
Mo1 La3 La1 41.627(15) . . no 
Mo2 La3 La1 40.266(18) . . no 
Mo1 La3 La2 40.957(18) . . no 
Mo2 La3 La2 41.281(16) . . no 
La1 La3 La2 50.407(17) . . no 
O2 Mo1 O1 104.8(3) . . no 
O2 Mo1 O3 106.3(3) . . no 
O1 Mo1 O3 106.6(3) . . no 
O2 Mo1 C1 102.8(3) . . no 
O1 Mo1 C1 90.7(3) . . no 
O3 Mo1 C1 140.6(3) . . no 
O2 Mo1 C2 136.4(3) . . no 
O1 Mo1 C2 88.4(3) . . no 
O3 Mo1 C2 109.3(3) . . no 
C1 Mo1 C2 34.5(3) . . no 
O2 Mo1 C3 131.5(3) . . no 
O1 Mo1 C3 117.3(3) . . no 
O3 Mo1 C3 84.6(3) . . no 
C1 Mo1 C3 56.1(3) . . no 
C2 Mo1 C3 33.3(3) . . no 
O2 Mo1 C4 97.6(3) . . no 
O1 Mo1 C4 143.7(3) . . no 
O3 Mo1 C4 93.7(3) . . no 
C1 Mo1 C4 56.3(3) . . no 
C2 Mo1 C4 56.2(3) . . no 
C3 Mo1 C4 33.9(3) . . no 
O2 Mo1 C5 82.1(3) . . no 
O1 Mo1 C5 122.2(3) . . no 
O3 Mo1 C5 126.8(3) . . no 
C1 Mo1 C5 34.0(3) . . no 
C2 Mo1 C5 56.6(3) . . no 
C3 Mo1 C5 56.0(3) . . no 
C4 Mo1 C5 33.6(3) . . no 
La2 Mo1 La3 97.68(3) . . no 
La2 Mo1 La1 79.61(3) . . no 
La3 Mo1 La1 96.77(2) . . no 
La2 Mo1 Mo2 56.30(2) . . no 
La3 Mo1 Mo2 56.84(2) . . no 
La1 Mo1 Mo2 54.81(2) . . no 
O5 Mo2 O6 107.7(3) . . no 
O5 Mo2 O4 105.3(3) . . no 
O6 Mo2 O4 105.9(3) . . no 
O5 Mo2 C12 142.7(3) . . no 
O6 Mo2 C12 97.7(3) . . no 
O4 Mo2 C12 93.1(3) . . no 
O5 Mo2 C11 114.2(3) . . no 
O6 Mo2 C11 132.4(3) . . no 
O4 Mo2 C11 84.2(3) . . no 
C12 Mo2 C11 34.7(3) . . no 
O5 Mo2 C13 122.5(3) . . no 
O6 Mo2 C13 82.4(3) . . no 
O4 Mo2 C13 126.6(3) . . no 
C12 Mo2 C13 34.1(3) . . no 
C11 Mo2 C13 56.7(3) . . no 
O5 Mo2 C14 90.4(3) . . no 
O6 Mo2 C14 103.7(3) . . no 
O4 Mo2 C14 140.0(3) . . no 
C12 Mo2 C14 56.6(3) . . no 
C11 Mo2 C14 56.0(3) . . no 
C13 Mo2 C14 34.1(3) . . no 
O5 Mo2 C15 86.2(3) . . no 
O6 Mo2 C15 136.5(3) . . no 
O4 Mo2 C15 109.8(3) . . no 
C12 Mo2 C15 56.8(3) . . no 
C11 Mo2 C15 33.6(3) . . no 
C13 Mo2 C15 56.5(3) . . no 
C14 Mo2 C15 33.6(3) . . no 
La1 Mo2 La2 80.58(2) . . no 
La1 Mo2 La3 97.83(2) . . no 
La2 Mo2 La3 96.84(2) . . no 
La1 Mo2 Mo1 56.93(2) . . no 
La2 Mo2 Mo1 55.90(2) . . no 
La3 Mo2 Mo1 56.12(2) . . no 
C5 C1 C2 108.1(7) . . no 
C5 C1 C6 126.7(10) . . no 
C2 C1 C6 125.2(10) . . no 
C5 C1 Mo1 74.9(4) . . no 
C2 C1 Mo1 72.8(4) . . no 
C6 C1 Mo1 119.9(6) . . no 
C3 C2 C1 107.9(8) . . no 
C3 C2 C7 126.8(9) . . no 
C1 C2 C7 125.2(9) . . no 
C3 C2 Mo1 74.3(5) . . no 
C1 C2 Mo1 72.7(4) . . no 
C7 C2 Mo1 120.4(6) . . no 
C2 C3 C4 108.8(8) . . no 
C2 C3 C8 126.5(9) . . no 
C4 C3 C8 124.7(9) . . no 
C2 C3 Mo1 72.4(4) . . no 
C4 C3 Mo1 73.3(4) . . no 
C8 C3 Mo1 120.7(6) . . no 
C5 C4 C3 108.0(7) . . no 
C5 C4 C9 124.8(9) . . no 
C3 C4 C9 127.2(9) . . no 
C5 C4 Mo1 73.8(4) . . no 
C3 C4 Mo1 72.8(4) . . no 
C9 C4 Mo1 119.1(6) . . no 
C4 C5 C1 107.2(7) . . no 
C4 C5 C10 126.7(9) . . no 
C1 C5 C10 126.1(9) . . no 
C4 C5 Mo1 72.6(4) . . no 
C1 C5 Mo1 71.1(4) . . no 
C10 C5 Mo1 119.9(6) . . no 
C15 C11 C12 108.5(8) . . no 
C15 C11 C16 125.0(9) . . no 
C12 C11 C16 126.5(8) . . no 
C15 C11 Mo2 74.7(4) . . no 
C12 C11 Mo2 71.8(4) . . no 
C16 C11 Mo2 121.5(6) . . no 
C13 C12 C11 107.4(8) . . no 
C13 C12 C17 126.6(10) . . no 
C11 C12 C17 125.9(10) . . no 
C13 C12 Mo2 73.8(5) . . no 
C11 C12 Mo2 73.4(4) . . no 
C17 C12 Mo2 115.5(5) . . no 
C12 C13 C14 108.0(8) . . no 
C12 C13 C18 125.4(11) . . no 
C14 C13 C18 126.5(11) . . no 
C12 C13 Mo2 72.1(5) . . no 
C14 C13 Mo2 74.0(5) . . no 
C18 C13 Mo2 121.7(7) . . no 
C15 C14 C13 108.4(8) . . no 
C15 C14 C19 126.0(10) . . no 
C13 C14 C19 125.6(11) . . no 
C15 C14 Mo2 73.6(4) . . no 
C13 C14 Mo2 71.9(5) . . no 
C19 C14 Mo2 118.4(6) . . no 
C11 C15 C14 107.7(8) . . no 
C11 C15 C20 127.7(9) . . no 
C14 C15 C20 124.5(9) . . no 
C11 C15 Mo2 71.7(4) . . no 
C14 C15 Mo2 72.8(4) . . no 
C20 C15 Mo2 123.5(6) . . no 
Mo1 O1 La1 156.6(3) . . no 
Mo1 O2 La2 157.1(3) . . no 
Mo1 O3 La3 160.3(3) . . no 
Mo2 O4 La1 151.1(3) . . no 
Mo2 O5 La2 155.6(3) . . no 
Mo2 O6 La3 170.4(3) . . no 
La1 OW1 O52 123.7(3) . . no 
La3 OW3 O101 106.4(3) . . no 
La3 OW3 O41 128.6(3) . . no 
O101 OW3 O41 107.6(3) . . no 
O13 N11 O12 123.2(7) . . no 
O13 N11 O11 119.0(6) . . no 
O12 N11 O11 117.7(6) . . no 
N11 O11 La1 95.5(4) . . no 
N11 O11 La2 101.9(4) . . no 
La1 O11 La2 151.0(2) . . no 
N11 O12 La1 97.9(4) . . no 
N11 O13 La2 93.8(5) . . no 
O23 N21 O21 122.3(8) . . no 
O23 N21 O22 120.6(8) . . no 
O21 N21 O22 117.1(7) . . no 
N21 O21 La1 97.3(5) . . no 
N21 O22 La1 97.0(5) . . no 
O33 N31 O32 122.5(8) . . no 
O33 N31 O31 121.1(7) . . no 
O32 N31 O31 116.5(7) . . no 
N31 O31 La2 96.6(4) . . no 
N31 O32 La2 98.6(5) . . no 
O43 N41 O42 123.5(11) . . no 
O43 N41 O41 120.1(10) . . no 
O42 N41 O41 116.4(8) . . no 
N41 O41 La2 98.5(5) . . no 
N41 O42 La2 95.5(5) . . no 
O51 N51 O53 124.1(9) . . no 
O51 N51 O52 118.2(8) . . no 
O53 N51 O52 117.7(9) . . no 
N51 O51 La3 100.1(5) . . no 
N51 O52 La3 93.6(5) . . no 
N51 O52 OW1 121.7(6) . . no 
La3 O52 OW1 135.6(3) . . no 
O63 N61 O61 123.0(11) . . no 
O63 N61 O62 119.9(10) . . no 
O61 N61 O62 117.1(9) . . no 
N61 O61 La3 98.4(6) . . no 
N61 O62 La3 95.3(6) . . no 
C4T O1T C1T 106.8(8) . . no 
C4T O1T La2 125.2(6) . . no 
C1T O1T La2 127.6(6) . . no 
O1T C1T C2T 105.6(8) . . no 
C3T C2T C1T 102.9(9) . . no 
C4T C3T C2T 107.4(9) . . no 
O1T C4T C3T 105.1(10) . . no 
O72 N71 O71 140.1(18) . . no 
O72 N71 O73 108.2(15) . . no 
O71 N71 O73 111.7(14) . . no 
O72 N71A O73A 104.7(19) . . no 
O72 N71A O71 138.7(17) . . no 
O73A N71A O71 115.6(17) . . no 
N71 O71 La1 102.9(10) . . no 
N71A O71 La1 131.2(9) . . no 
N71A O72 La1 131.0(12) . 2_665 no 
N71 O72 La1 104.0(11) . 2_665 no 
N71 O73 La1 105.7(9) . 2_665 no 
N71A O73 La1 102.2(8) . 2_665 no 
N71 O73 La1 100.9(9) . . no 
N71A O73 La1 104.1(8) . . no 
La1 O73 La1 153.4(5) 2_665 . no 
C101 O101 C104 104.6(12) . . no 
C102 C101 O101 107.7(17) . . no 
C101 C102 C103 109.8(17) . . no 
C102 C103 C104 106.5(16) . . no 
O101 C104 C103 105.2(15) . . no 
C204 O201 C201 111.6(12) . . no 
O201 C201 C202 103.1(15) . . no 
C203 C202 C201 105(2) . . no 
C202 C203 C204 109.0(17) . . no 
O201 C204 C203 103.6(15) . . no 
 
_diffrn_measured_fraction_theta_max    0.993 
_diffrn_reflns_theta_full              35.10 
_diffrn_measured_fraction_theta_full   0.993 
_refine_diff_density_max    1.567 
_refine_diff_density_min   -3.197 
_refine_diff_density_rms    0.265 


#===END

 
data_yagcm1b 
 
_audit_creation_method            SHELXL-97 
_chemical_name_systematic 
; 
 ? 
; 
_chemical_name_common             (Ce6Mo4)(Ce3Mo2)2_ion_pair 
_chemical_formula_moiety          ? 
_chemical_formula_sum 
 'C28 H66 Ce3 Mo2 N7 O38' 
_chemical_formula_weight          1721.12 
 
loop_ 
 _atom_type_symbol 
 _atom_type_description 
 _atom_type_scat_dispersion_real 
 _atom_type_scat_dispersion_imag 
 _atom_type_scat_source 
 'Ce'  'Ce'  -0.2486   2.6331 
 'International Tables Vol C Tables 4.2.6.8 and 6.1.1.4' 
 'Mo'  'Mo'  -1.6832   0.6857 
 'International Tables Vol C Tables 4.2.6.8 and 6.1.1.4' 
 'O'  'O'   0.0106   0.0060 
 'International Tables Vol C Tables 4.2.6.8 and 6.1.1.4' 
 'N'  'N'   0.0061   0.0033 
 'International Tables Vol C Tables 4.2.6.8 and 6.1.1.4' 
 'C'  'C'   0.0033   0.0016 
 'International Tables Vol C Tables 4.2.6.8 and 6.1.1.4' 
 'H'  'H'   0.0000   0.0000 
 'International Tables Vol C Tables 4.2.6.8 and 6.1.1.4' 
 
_symmetry_cell_setting            triclinic 
_symmetry_space_group_name_H-M    P -1 
 
loop_ 
 _symmetry_equiv_pos_as_xyz 
 'x, y, z' 
 '-x, -y, -z' 
 
_cell_length_a                    21.387(6) 
_cell_length_b                    30.37(2) 
_cell_length_c                    12.441(6) 
_cell_angle_alpha                 97.65(4) 
_cell_angle_beta                  102.75(3) 
_cell_angle_gamma                 102.52(4) 
_cell_volume                      7554(6) 
_cell_formula_units_Z             4 
_cell_measurement_temperature     296(2) 
_cell_measurement_reflns_used     25 
_cell_measurement_theta_min       15.40 
_cell_measurement_theta_max       17.12 
 
_exptl_crystal_description        plate 
_exptl_crystal_colour             yellow 
_exptl_crystal_size_max           0.50 
_exptl_crystal_size_mid           0.40 
_exptl_crystal_size_min           0.08 
_exptl_crystal_density_meas       'not measured' 
_exptl_crystal_density_diffrn     1.513 
_exptl_crystal_density_method     'not measured' 
_exptl_crystal_F_000              3380 
_exptl_absorpt_coefficient_mu     2.173 
_exptl_absorpt_correction_type    psi-scan 
_exptl_absorpt_correction_T_min   0.7915 
_exptl_absorpt_correction_T_max   1.0000 
 
_exptl_special_details 
; 
 ? 
; 
 
_diffrn_ambient_temperature       296(2) 
_diffrn_radiation_wavelength      0.71069 
_diffrn_radiation_type            MoK\a 
_diffrn_radiation_source          'normal focus rotating anode' 
_diffrn_radiation_monochromator   graphite 
_diffrn_measurement_device_type   'RIGAKU AFC-5R' 
_diffrn_measurement_method        \w 
_diffrn_standards_number          3 
_diffrn_standards_interval_count  200 
_diffrn_standards_decay_%         '-12.5,1.8,-4.8' 
_diffrn_reflns_number             26589 
_diffrn_reflns_av_R_equivalents   0.0000 
_diffrn_reflns_av_sigmaI/netI     0.2875 
_diffrn_reflns_limit_h_min        -24 
_diffrn_reflns_limit_h_max        25 
_diffrn_reflns_limit_k_min        -36 
_diffrn_reflns_limit_k_max        0 
_diffrn_reflns_limit_l_min        -14 
_diffrn_reflns_limit_l_max        14 
_diffrn_reflns_theta_min          2.51 
_diffrn_reflns_theta_max          25.00 
_reflns_number_total              26589 
_reflns_number_gt                 9874 
_reflns_threshold_expression      >2sigma(I) 
 
_computing_data_collection        TEXSAN 
_computing_cell_refinement        TEXSAN 
_computing_data_reduction         TEXSAN 
_computing_structure_solution     'SHELXS-97 (Sheldrick, 1990)' 
_computing_structure_refinement   'SHELXL-97 (Sheldrick, 1997)' 
_computing_molecular_graphics     ORTEPII 
 
_refine_special_details 
; 
 Refinement of F^2^ against ALL reflections.  The weighted R-factor wR and 
 goodness of fit S are based on F^2^, conventional R-factors R are based 
 on F, with F set to zero for negative F^2^. The threshold expression of 
 F^2^ > 2sigma(F^2^) is used only for calculating R-factors(gt) etc. and is 
 not relevant to the choice of reflections for refinement.  R-factors based 
 on F^2^ are statistically about twice as large as those based on F, and R- 
 factors based on ALL data will be even larger. 
; 
 
_refine_ls_structure_factor_coef  Fsqd  
_refine_ls_matrix_type            full 
_refine_ls_weighting_scheme 
 'calc w=1/[\s^2^(Fo^2^)+(0.1300P)^2^+0.0000P] where P=(Fo^2^+2Fc^2^)/3' 
_atom_sites_solution_primary      direct 
_atom_sites_solution_secondary    difmap 
_atom_sites_solution_hydrogens    geom 
_refine_ls_hydrogen_treatment     mixed 
_refine_ls_extinction_method      SHELXL 
_refine_ls_extinction_coef        0.00036(9) 
_refine_ls_extinction_expression 
 'Fc^*^=kFc[1+0.001xFc^2^\l^3^/sin(2\q)]^-1/4^' 
_refine_ls_number_reflns          26589 
_refine_ls_number_parameters      1262 
_refine_ls_number_restraints      0 
_refine_ls_R_factor_all           0.2693 
_refine_ls_R_factor_gt            0.0936 
_refine_ls_wR_factor_ref          0.3050 
_refine_ls_wR_factor_gt           0.2346 
_refine_ls_goodness_of_fit_ref    1.023 
_refine_ls_restrained_S_all       1.023 
_refine_ls_shift/su_max           0.090 
_refine_ls_shift/su_mean          0.005 
 
loop_ 
 _atom_site_label 
 _atom_site_type_symbol 
 _atom_site_fract_x 
 _atom_site_fract_y 
 _atom_site_fract_z 
 _atom_site_U_iso_or_equiv 
 _atom_site_adp_type 
 _atom_site_occupancy 
 _atom_site_calc_flag 
 _atom_site_refinement_flags 
 _atom_site_disorder_assembly 
 _atom_site_disorder_group 
Ce1 Ce 0.27025(6) 0.26638(5) 0.36165(10) 0.0435(4) Uani 1 d . . . 
Ce2 Ce 0.49827(6) 0.22213(5) 0.46409(10) 0.0444(4) Uani 1 d . . . 
Ce3 Ce 0.51598(7) 0.42795(5) 0.51648(12) 0.0539(4) Uani 1 d . . . 
Mo1 Mo 0.44024(10) 0.31141(8) 0.27072(15) 0.0449(6) Uani 1 d . . . 
Mo2 Mo 0.42699(10) 0.31701(8) 0.63397(15) 0.0433(5) Uani 1 d . . . 
O11 O 0.3574(7) 0.2982(6) 0.2823(12) 0.053(4) Uani 1 d . . . 
O12 O 0.4768(7) 0.2693(5) 0.3310(11) 0.044(4) Uani 1 d . . . 
O13 O 0.4802(9) 0.3640(6) 0.3605(12) 0.061(5) Uani 1 d . . . 
O21 O 0.3482(7) 0.3008(6) 0.5360(11) 0.056(5) Uani 1 d . . . 
O22 O 0.4676(7) 0.2776(5) 0.5905(11) 0.054(4) Uani 1 d . . . 
O23 O 0.4688(9) 0.3702(6) 0.6085(12) 0.061(5) Uani 1 d . . . 
N1A N 0.3427(9) 0.1944(7) 0.4513(16) 0.048(5) Uani 1 d . . . 
O1A O 0.3656(7) 0.2217(6) 0.3904(12) 0.049(4) Uani 1 d . . . 
O1B O 0.2848(7) 0.1941(6) 0.4589(13) 0.060(5) Uani 1 d . . . 
O1C O 0.3769(8) 0.1725(6) 0.4988(13) 0.061(5) Uani 1 d . . . 
N2A N 0.2451(12) 0.3580(10) 0.443(3) 0.081(8) Uani 1 d . . . 
O2A O 0.2823(8) 0.3529(6) 0.3779(15) 0.065(5) Uani 1 d . . . 
O2B O 0.2165(9) 0.3228(8) 0.4665(18) 0.085(6) Uani 1 d . . . 
O2C O 0.2418(14) 0.3958(8) 0.472(2) 0.132(11) Uani 1 d . . . 
N3A N 0.6126(14) 0.1899(12) 0.386(2) 0.093(9) Uani 1 d . . . 
O3A O 0.5824(9) 0.2151(8) 0.3373(16) 0.079(6) Uani 1 d . . . 
O3B O 0.5910(11) 0.1765(9) 0.464(2) 0.105(8) Uani 1 d . . . 
O3C O 0.6515(12) 0.1724(10) 0.3550(19) 0.122(10) Uani 1 d . . . 
N4A N 0.6234(11) 0.2910(9) 0.6152(19) 0.067(7) Uani 1 d . . . 
O4A O 0.5920(8) 0.2973(7) 0.5218(15) 0.070(5) Uani 1 d . . . 
O4B O 0.6004(10) 0.2518(7) 0.6367(17) 0.089(7) Uani 1 d . . . 
O4C O 0.6715(11) 0.3197(9) 0.671(2) 0.142(12) Uani 1 d . . . 
N5A N 0.6235(13) 0.4902(10) 0.709(3) 0.104(10) Uani 1 d . . . 
O5A O 0.5821(12) 0.4545(8) 0.7264(17) 0.108(9) Uani 1 d . . . 
O5B O 0.6174(12) 0.4958(8) 0.6063(18) 0.096(8) Uani 1 d . . . 
O5C O 0.6573(18) 0.5236(12) 0.785(2) 0.22(2) Uani 1 d . . . 
N6A N 0.556(2) 0.4963(11) 0.359(3) 0.130(16) Uani 1 d . . . 
O6A O 0.5825(12) 0.4616(9) 0.3699(17) 0.105(8) Uani 1 d . . . 
O6B O 0.4902(10) 0.5032(9) 0.5923(17) 0.082(7) Uani 1 d . . . 
O6C O 0.576(2) 0.5216(11) 0.304(3) 0.22(2) Uani 1 d . . . 
C10 C 0.5005(14) 0.3344(13) 0.1343(17) 0.074(10) Uani 1 d . . . 
C11 C 0.4442(14) 0.3535(9) 0.1187(16) 0.050(7) Uani 1 d . . . 
C12 C 0.3902(17) 0.3147(10) 0.0784(16) 0.069(10) Uani 1 d . . . 
C13 C 0.4058(15) 0.2765(10) 0.0753(19) 0.060(8) Uani 1 d . . . 
C14 C 0.4773(17) 0.2872(12) 0.1130(19) 0.071(9) Uani 1 d . . . 
C15 C 0.5694(15) 0.3650(15) 0.180(3) 0.110(13) Uani 1 d . . . 
C16 C 0.442(2) 0.4041(12) 0.139(3) 0.116(14) Uani 1 d . . . 
C17 C 0.3173(16) 0.3148(16) 0.047(3) 0.125(16) Uani 1 d . . . 
C18 C 0.3632(18) 0.2264(14) 0.046(3) 0.117(14) Uani 1 d . . . 
C19 C 0.5226(19) 0.2528(15) 0.113(3) 0.118(14) Uani 1 d . . . 
C20 C 0.4256(14) 0.2762(9) 0.7921(16) 0.054(7) Uani 1 d . . . 
C21 C 0.3651(13) 0.2917(10) 0.767(2) 0.059(7) Uani 1 d . . . 
C22 C 0.3833(16) 0.3427(11) 0.7827(18) 0.068(9) Uani 1 d . . . 
C23 C 0.4554(16) 0.3580(12) 0.8287(17) 0.080(11) Uani 1 d . . . 
C24 C 0.4806(17) 0.3159(12) 0.828(2) 0.076(9) Uani 1 d . . . 
C25 C 0.432(2) 0.2311(10) 0.787(2) 0.095(12) Uani 1 d . . . 
C26 C 0.486(2) 0.4129(14) 0.863(3) 0.16(2) Uani 1 d . . . 
C27 C 0.5514(15) 0.3185(16) 0.862(3) 0.123(15) Uani 1 d . . . 
C28 C 0.329(2) 0.3700(17) 0.760(3) 0.15(2) Uani 1 d . . . 
C29 C 0.2944(13) 0.2588(11) 0.722(2) 0.079(10) Uani 1 d . . . 
O1WA O 0.1708(7) 0.2258(6) 0.4169(15) 0.061(5) Uani 1 d . . . 
O1WB O 0.2347(8) 0.1974(6) 0.2070(13) 0.063(5) Uani 1 d . . . 
O1WC O 0.1810(9) 0.2781(6) 0.2047(15) 0.077(6) Uani 1 d . . . 
O2WA O 0.4995(8) 0.1669(6) 0.6029(12) 0.058(5) Uani 1 d . . . 
O2WB O 0.4459(8) 0.1525(6) 0.3139(13) 0.065(5) Uani 1 d . . . 
O3WA O 0.6088(9) 0.3904(7) 0.5323(18) 0.085(6) Uani 1 d . . . 
O3WB O 0.3987(9) 0.4234(7) 0.4283(18) 0.088(7) Uani 1 d . . . 
Ce4 Ce -0.01561(6) -0.14221(5) 0.02900(10) 0.0442(4) Uani 1 d . . . 
Ce5 Ce 0.27225(6) -0.14743(5) 0.21911(11) 0.0448(4) Uani 1 d . . . 
Ce6 Ce 0.23414(6) 0.01808(5) 0.23640(10) 0.0418(4) Uani 1 d . . . 
Mo3 Mo 0.13040(9) -0.09749(8) 0.32190(14) 0.0407(5) Uani 1 d . . . 
Mo4 Mo 0.16768(9) -0.09432(8) -0.02268(14) 0.0395(5) Uani 1 d . . . 
O34 O 0.0568(7) -0.1183(6) 0.2153(11) 0.058(5) Uani 1 d . . . 
O35 O 0.1835(7) -0.1314(6) 0.2929(11) 0.051(4) Uani 1 d . . . 
O36 O 0.1645(7) -0.0427(6) 0.3034(12) 0.052(4) Uani 1 d . . . 
O44 O 0.0834(7) -0.1164(6) -0.0256(11) 0.053(5) Uani 1 d . . . 
O45 O 0.2122(8) -0.1288(6) 0.0496(11) 0.059(5) Uani 1 d . . . 
O46 O 0.1925(7) -0.0406(6) 0.0628(11) 0.052(4) Uani 1 d . . . 
N11A N -0.0201(18) -0.0514(9) 0.132(3) 0.112(16) Uani 1 d . . . 
O11A O -0.0663(9) -0.0872(7) 0.1297(15) 0.067(5) Uani 1 d . . . 
O11B O 0.0159(10) -0.0559(9) 0.0770(16) 0.079(7) Uani 1 d . . . 
O11C O -0.0183(11) -0.0201(11) 0.197(3) 0.127(9) Uani 1 d . . . 
N12A N -0.0893(10) -0.1338(9) -0.2081(18) 0.057(6) Uani 1 d . . . 
O12A O -0.0678(9) -0.1684(7) -0.1943(12) 0.064(5) Uani 1 d . . . 
O12B O -0.0791(8) -0.1037(7) -0.1232(13) 0.066(5) Uani 1 d . . . 
O12C O -0.1202(8) -0.1323(6) -0.3039(13) 0.062(5) Uani 1 d . . . 
N13A N -0.1339(11) -0.1990(9) 0.082(2) 0.079(8) Uani 1 d . . . 
O13A O -0.0777(9) -0.1891(8) 0.1509(14) 0.097(8) Uani 1 d . . . 
O13B O -0.1393(8) -0.1811(7) -0.0077(15) 0.079(6) Uani 1 d . . . 
O13C O -0.1827(10) -0.2241(9) 0.0976(19) 0.120(10) Uani 1 d . . . 
N14A N 0.0126(15) -0.2362(9) -0.014(2) 0.080(8) Uani 1 d . . . 
O14A O 0.0513(10) -0.2036(7) 0.060(2) 0.102(8) Uani 1 d . . . 
O14B O -0.0394(10) -0.2275(8) -0.0585(18) 0.094(7) Uani 1 d . . . 
O14C O 0.0274(15) -0.2720(9) -0.030(3) 0.174(15) Uani 1 d . . . 
N15A N 0.3296(9) -0.0476(7) 0.2041(17) 0.041(5) Uani 1 d . . . 
O15A O 0.2862(7) -0.0588(5) 0.2591(11) 0.043(4) Uani 1 d . . . 
O15B O 0.3566(9) -0.0762(7) 0.1738(15) 0.070(5) Uani 1 d . . . 
O15C O 0.3420(8) -0.0090(7) 0.1860(15) 0.066(5) Uani 1 d . . . 
N16A N 0.3758(13) -0.1890(10) 0.139(2) 0.083(8) Uani 1 d . . . 
O16A O 0.3193(11) -0.1917(8) 0.0781(14) 0.095(8) Uani 1 d . . . 
O16B O 0.3889(8) -0.1638(7) 0.2359(15) 0.071(5) Uani 1 d . . . 
O16C O 0.4181(12) -0.2044(11) 0.1104(17) 0.133(12) Uani 1 d . . . 
N17A O 0.3551(13) 0.0626(10) 0.434(2) 0.114(9) Uani 1 d . . . 
O17A O 0.3131(8) 0.0276(7) 0.4341(14) 0.064(5) Uani 1 d . . . 
O17B O 0.3484(8) 0.0788(7) 0.3394(15) 0.068(5) Uani 1 d . . . 
O17C O 0.4053(9) 0.0794(7) 0.5095(16) 0.082(6) Uani 1 d . . . 
N18A N 0.2680(12) 0.0985(10) 0.1114(19) 0.068(6) Uani 1 d . . . 
O18A O 0.2416(9) 0.1027(7) 0.1941(13) 0.069(5) Uani 1 d . . . 
O18B O 0.2785(9) 0.0576(7) 0.0903(16) 0.071(6) Uani 1 d . . . 
O18C O 0.2826(12) 0.1296(8) 0.0659(19) 0.102(8) Uani 1 d . . . 
C30 C 0.0553(11) -0.1010(10) 0.4445(18) 0.050(7) Uani 1 d . . . 
C31 C 0.0847(14) -0.1373(10) 0.4507(18) 0.059(7) Uani 1 d . . . 
C32 C 0.1556(14) -0.1157(18) 0.505(2) 0.103(16) Uani 1 d . . . 
C33 C 0.1661(14) -0.0685(13) 0.524(2) 0.075(10) Uani 1 d . . . 
C34 C 0.1060(12) -0.0592(10) 0.4891(16) 0.054(7) Uani 1 d . . . 
C35 C -0.0193(12) -0.1044(15) 0.399(2) 0.110(14) Uani 1 d . . . 
C36 C 0.0466(19) -0.1933(11) 0.412(3) 0.105(13) Uani 1 d . . . 
C37 C 0.1982(19) -0.1554(16) 0.524(3) 0.133(17) Uani 1 d . . . 
C38 C 0.2337(12) -0.0382(13) 0.577(2) 0.097(13) Uani 1 d . . . 
C39 C 0.1016(16) -0.0131(11) 0.499(2) 0.081(9) Uani 1 d . . . 
C40 C 0.1776(11) -0.0520(10) -0.1769(17) 0.051(7) Uani 1 d . . . 
C41 C 0.1254(12) -0.0896(9) -0.2180(16) 0.045(6) Uani 1 d . . . 
C42 C 0.1494(14) -0.1312(11) -0.2134(16) 0.063(8) Uani 1 d . . . 
C43 C 0.2196(12) -0.1153(11) -0.1659(18) 0.055(7) Uani 1 d . . . 
C44 C 0.2362(12) -0.0681(12) -0.1434(18) 0.066(9) Uani 1 d . . . 
C45 C 0.1782(14) -0.0037(9) -0.165(3) 0.066(8) Uani 1 d . . . 
C46 C 0.0527(11) -0.0889(10) -0.261(2) 0.061(8) Uani 1 d . . . 
C47 C 0.1074(19) -0.1829(15) -0.251(3) 0.112(13) Uani 1 d . . . 
C48 C 0.2656(12) -0.1477(11) -0.149(2) 0.072(9) Uani 1 d . . . 
C49 C 0.3062(12) -0.0379(15) -0.092(2) 0.114(15) Uani 1 d . . . 
O5WA O 0.3411(9) -0.1179(7) 0.4163(14) 0.078(6) Uani 1 d . . . 
O5WB O 0.2805(9) -0.2167(6) 0.3120(17) 0.073(6) Uani 1 d . . . 
O5WC O 0.1779(9) -0.2155(7) 0.1224(17) 0.085(6) Uani 1 d . . . 
O6WA O 0.2020(9) 0.0702(6) 0.3771(13) 0.068(5) Uani 1 d . . . 
O6WB O 0.1223(7) 0.0235(6) 0.1377(13) 0.055(5) Uani 1 d . . . 
O11T O 0.2329(12) 0.0893(9) 0.6061(16) 0.117(9) Uani 1 d . . . 
C11T C 0.2981(16) 0.1016(14) 0.681(3) 0.111(13) Uani 1 d . . . 
C12T C 0.279(3) 0.1190(13) 0.791(2) 0.15(2) Uani 1 d . . . 
C13T C 0.222(6) 0.132(4) 0.762(7) 0.39(8) Uani 1 d . . . 
C14T C 0.192(3) 0.1170(17) 0.640(5) 0.16(2) Uani 1 d . . . 
O21T O 0.4785(11) 0.1239(9) 0.1288(19) 0.120(9) Uani 1 d . . . 
C21T C 0.5406(18) 0.1305(16) 0.092(3) 0.142(19) Uani 1 d . . . 
C22T C 0.524(2) 0.094(2) -0.006(5) 0.22(3) Uani 1 d . . . 
C23T C 0.448(3) 0.074(2) -0.045(4) 0.21(3) Uani 1 d . . . 
C24T C 0.422(2) 0.091(2) 0.040(3) 0.17(2) Uani 1 d . . . 
 
loop_ 
 _atom_site_aniso_label 
 _atom_site_aniso_U_11 
 _atom_site_aniso_U_22 
 _atom_site_aniso_U_33 
 _atom_site_aniso_U_23 
 _atom_site_aniso_U_13 
 _atom_site_aniso_U_12 
Ce1 0.0318(7) 0.0626(10) 0.0352(7) 0.0107(7) 0.0064(6) 0.0118(7) 
Ce2 0.0362(7) 0.0659(11) 0.0345(7) 0.0163(7) 0.0081(6) 0.0172(7) 
Ce3 0.0568(9) 0.0563(11) 0.0436(8) 0.0136(7) 0.0107(7) 0.0040(8) 
Mo1 0.0490(12) 0.0630(16) 0.0262(10) 0.0163(10) 0.0128(9) 0.0134(11) 
Mo2 0.0460(12) 0.0576(15) 0.0249(9) 0.0100(9) 0.0093(9) 0.0090(11) 
O11 0.038(9) 0.085(13) 0.038(8) 0.030(8) 0.013(7) 0.007(9) 
O12 0.054(10) 0.053(11) 0.037(8) 0.015(7) 0.021(7) 0.024(8) 
O13 0.080(13) 0.055(12) 0.037(9) -0.002(8) 0.010(9) 0.009(10) 
O21 0.039(9) 0.100(14) 0.020(7) -0.003(8) 0.002(6) 0.016(9) 
O22 0.050(10) 0.063(12) 0.028(8) -0.006(8) -0.006(7) -0.002(9) 
O23 0.083(13) 0.060(12) 0.032(8) 0.006(8) 0.002(8) 0.014(10) 
N1A 0.028(11) 0.060(15) 0.046(12) 0.017(11) -0.006(9) 0.001(10) 
O1A 0.033(9) 0.072(12) 0.050(9) 0.025(9) 0.006(7) 0.026(8) 
O1B 0.025(9) 0.112(15) 0.049(10) 0.031(10) 0.001(7) 0.028(9) 
O1C 0.052(11) 0.085(14) 0.052(10) 0.029(10) 0.006(8) 0.027(10) 
N2A 0.062(17) 0.053(19) 0.14(2) 0.011(17) 0.045(17) 0.015(15) 
O2A 0.045(11) 0.080(14) 0.062(11) 0.014(10) 0.005(9) 0.006(10) 
O2B 0.053(12) 0.088(17) 0.112(17) 0.027(14) 0.020(11) 0.011(12) 
O2C 0.17(3) 0.060(16) 0.20(3) -0.004(17) 0.10(2) 0.066(18) 
N3A 0.071(19) 0.17(3) 0.059(17) 0.023(18) 0.029(15) 0.06(2) 
O3A 0.048(11) 0.130(19) 0.079(14) 0.043(13) 0.033(10) 0.034(12) 
O3B 0.093(17) 0.16(2) 0.091(17) 0.043(16) 0.028(14) 0.083(17) 
O3C 0.093(17) 0.23(3) 0.092(17) 0.053(18) 0.045(14) 0.11(2) 
N4A 0.058(15) 0.070(19) 0.063(15) 0.002(14) -0.006(12) 0.024(14) 
O4A 0.033(9) 0.108(16) 0.072(12) 0.039(11) 0.008(9) 0.016(10) 
O4B 0.096(16) 0.044(13) 0.088(15) 0.004(11) -0.050(12) 0.013(12) 
O4C 0.063(15) 0.15(2) 0.15(2) 0.027(19) -0.057(15) -0.036(15) 
N5A 0.067(18) 0.07(2) 0.14(3) 0.01(2) -0.017(19) -0.015(15) 
O5A 0.13(2) 0.074(16) 0.071(14) 0.012(12) -0.025(13) -0.028(15) 
O5B 0.117(19) 0.104(18) 0.067(14) 0.036(13) 0.033(13) 0.007(14) 
O5C 0.23(4) 0.21(4) 0.075(18) -0.01(2) -0.07(2) -0.09(3) 
N6A 0.18(4) 0.05(2) 0.13(3) 0.01(2) -0.03(3) 0.05(3) 
O6A 0.098(17) 0.12(2) 0.078(15) 0.001(14) 0.052(13) -0.031(16) 
O6B 0.056(13) 0.13(2) 0.068(13) 0.007(12) 0.024(10) 0.030(13) 
O6C 0.36(5) 0.11(2) 0.27(4) 0.15(3) 0.19(4) 0.06(3) 
C10 0.067(19) 0.13(3) 0.008(11) 0.009(14) 0.002(11) -0.01(2) 
C11 0.074(18) 0.06(2) 0.015(10) 0.018(11) 0.005(11) 0.021(15) 
C12 0.13(3) 0.033(17) 0.009(10) -0.004(11) -0.003(13) -0.019(18) 
C13 0.09(2) 0.049(19) 0.033(13) 0.007(13) 0.023(14) -0.017(17) 
C14 0.11(3) 0.09(3) 0.022(13) 0.003(14) 0.038(15) 0.03(2) 
C15 0.06(2) 0.20(4) 0.07(2) 0.03(2) 0.032(17) 0.02(2) 
C16 0.20(4) 0.10(3) 0.07(2) 0.05(2) 0.03(2) 0.06(3) 
C17 0.06(2) 0.23(5) 0.07(2) 0.07(3) -0.011(17) 0.00(2) 
C18 0.11(3) 0.16(4) 0.06(2) 0.02(2) 0.03(2) -0.01(3) 
C19 0.11(3) 0.19(4) 0.07(2) 0.01(2) 0.04(2) 0.08(3) 
C20 0.079(19) 0.06(2) 0.013(10) 0.027(11) 0.008(11) -0.002(16) 
C21 0.054(17) 0.08(2) 0.046(14) 0.009(14) 0.036(13) 0.004(16) 
C22 0.11(2) 0.10(3) 0.016(11) 0.019(13) 0.031(14) 0.05(2) 
C23 0.09(2) 0.12(3) 0.010(11) 0.007(14) 0.019(13) -0.02(2) 
C24 0.12(3) 0.08(2) 0.027(13) -0.006(14) 0.018(15) 0.03(2) 
C25 0.21(4) 0.07(2) 0.052(17) 0.049(16) 0.06(2) 0.07(2) 
C26 0.22(5) 0.11(3) 0.08(3) -0.03(2) 0.04(3) -0.05(3) 
C27 0.045(19) 0.22(5) 0.08(2) 0.01(3) -0.005(17) 0.02(2) 
C28 0.23(5) 0.24(5) 0.11(3) 0.11(3) 0.12(3) 0.19(4) 
C29 0.057(17) 0.12(3) 0.045(15) 0.033(16) 0.021(13) -0.021(17) 
O1WA 0.036(9) 0.061(12) 0.089(13) 0.015(10) 0.029(9) 0.004(8) 
O1WB 0.057(11) 0.075(13) 0.051(10) 0.003(9) -0.008(8) 0.031(10) 
O1WC 0.069(13) 0.078(14) 0.074(13) 0.025(11) -0.014(10) 0.024(11) 
O2WA 0.047(10) 0.078(13) 0.042(9) 0.016(9) 0.003(8) 0.009(9) 
O2WB 0.051(10) 0.093(14) 0.046(10) 0.007(9) 0.007(8) 0.015(10) 
O3WA 0.054(12) 0.072(14) 0.117(17) 0.015(12) -0.002(11) 0.018(10) 
O3WB 0.054(12) 0.075(15) 0.123(18) 0.023(13) 0.009(12) 0.000(11) 
Ce4 0.0258(7) 0.0698(11) 0.0332(7) 0.0129(7) 0.0006(5) 0.0095(7) 
Ce5 0.0338(7) 0.0662(11) 0.0366(7) 0.0144(7) 0.0039(6) 0.0196(7) 
Ce6 0.0350(7) 0.0553(10) 0.0349(7) 0.0101(6) 0.0084(6) 0.0106(7) 
Mo3 0.0298(10) 0.0686(16) 0.0258(9) 0.0163(10) 0.0070(8) 0.0124(10) 
Mo4 0.0318(10) 0.0654(15) 0.0237(9) 0.0119(9) 0.0080(8) 0.0144(10) 
O34 0.046(10) 0.101(14) 0.020(7) 0.013(8) 0.002(7) 0.012(9) 
O35 0.045(9) 0.084(13) 0.030(8) 0.012(8) 0.012(7) 0.023(9) 
O36 0.032(8) 0.084(13) 0.042(9) 0.019(9) 0.006(7) 0.020(8) 
O44 0.031(8) 0.104(14) 0.021(7) 0.015(8) 0.004(6) 0.014(9) 
O45 0.069(11) 0.092(14) 0.026(8) 0.017(8) -0.002(8) 0.049(10) 
O46 0.052(10) 0.074(13) 0.033(8) 0.018(8) 0.012(7) 0.018(9) 
N11A 0.12(3) 0.040(18) 0.10(2) -0.067(18) -0.08(2) 0.03(2) 
O11A 0.062(12) 0.067(14) 0.068(12) -0.009(11) 0.009(10) 0.028(11) 
O11B 0.072(14) 0.14(2) 0.060(12) 0.030(13) 0.027(11) 0.077(15) 
O11C 0.067(16) 0.15(3) 0.16(3) 0.04(2) 0.034(17) 0.025(17) 
N12A 0.059(14) 0.084(18) 0.052(14) 0.054(14) 0.019(11) 0.036(13) 
O12A 0.073(12) 0.083(14) 0.031(9) 0.007(9) -0.006(8) 0.031(11) 
O12B 0.063(12) 0.106(16) 0.027(9) 0.005(10) -0.006(8) 0.038(11) 
O12C 0.066(11) 0.085(14) 0.040(9) 0.022(9) 0.002(8) 0.038(10) 
N13A 0.045(15) 0.11(2) 0.072(17) 0.005(16) 0.022(13) 0.002(15) 
O13A 0.042(11) 0.18(2) 0.047(11) 0.038(13) -0.004(9) -0.012(13) 
O13B 0.033(10) 0.131(19) 0.066(12) 0.051(12) -0.007(9) 0.006(10) 
O13C 0.055(13) 0.19(3) 0.106(17) 0.053(17) 0.038(12) -0.025(15) 
N14A 0.12(2) 0.050(18) 0.079(18) 0.023(15) 0.016(17) 0.040(18) 
O14A 0.062(13) 0.070(16) 0.13(2) -0.017(14) -0.028(13) 0.010(12) 
O14B 0.078(15) 0.107(18) 0.092(15) 0.038(13) -0.016(12) 0.038(14) 
O14C 0.15(3) 0.045(17) 0.28(4) 0.01(2) -0.02(3) 0.028(17) 
N15A 0.028(10) 0.030(13) 0.066(13) 0.009(11) 0.013(9) 0.011(10) 
O15A 0.030(8) 0.065(11) 0.035(8) 0.009(8) 0.008(7) 0.019(8) 
O15B 0.054(11) 0.087(15) 0.081(13) 0.027(11) 0.022(10) 0.033(11) 
O15C 0.033(10) 0.080(15) 0.085(13) 0.010(11) 0.013(9) 0.022(10) 
N16A 0.084(19) 0.12(2) 0.056(16) 0.002(15) 0.013(14) 0.060(18) 
O16A 0.109(17) 0.16(2) 0.036(10) 0.010(12) 0.011(11) 0.095(17) 
O16B 0.051(11) 0.101(16) 0.057(12) 0.011(11) -0.006(9) 0.036(11) 
O16C 0.120(19) 0.28(3) 0.070(14) 0.053(18) 0.055(14) 0.16(2) 
N17A 0.087(19) 0.12(2) 0.10(2) 0.008(18) -0.031(16) 0.041(17) 
O17A 0.037(10) 0.075(14) 0.062(11) 0.028(10) -0.002(8) -0.013(10) 
O17B 0.054(11) 0.092(15) 0.058(11) 0.014(11) 0.021(9) 0.008(10) 
O17C 0.058(12) 0.077(15) 0.079(13) 0.009(11) -0.031(11) 0.001(10) 
N18A 0.070(16) 0.08(2) 0.061(15) 0.022(15) 0.021(13) 0.023(15) 
O18A 0.068(12) 0.113(17) 0.042(10) 0.024(10) 0.020(9) 0.043(12) 
O18B 0.082(14) 0.071(14) 0.083(13) 0.047(11) 0.050(11) 0.019(12) 
O18C 0.13(2) 0.103(19) 0.107(17) 0.057(15) 0.083(16) 0.021(15) 
C30 0.039(14) 0.07(2) 0.040(13) 0.014(13) 0.021(11) 0.005(14) 
C31 0.075(19) 0.07(2) 0.026(12) 0.017(13) 0.021(12) 0.005(16) 
C32 0.06(2) 0.28(5) 0.031(14) 0.10(3) 0.044(14) 0.11(3) 
C33 0.040(16) 0.14(3) 0.045(16) 0.04(2) 0.003(12) 0.008(19) 
C34 0.051(16) 0.09(2) 0.017(11) -0.014(12) 0.012(10) 0.024(16) 
C35 0.017(13) 0.25(4) 0.054(17) 0.01(2) 0.004(12) 0.031(19) 
C36 0.14(3) 0.08(3) 0.07(2) -0.007(18) 0.04(2) -0.02(2) 
C37 0.13(3) 0.26(5) 0.07(2) 0.09(3) 0.05(2) 0.13(4) 
C38 0.023(13) 0.19(4) 0.042(15) 0.009(19) 0.004(11) -0.027(17) 
C39 0.11(3) 0.08(2) 0.08(2) 0.016(17) 0.040(19) 0.05(2) 
C40 0.032(13) 0.09(2) 0.029(12) 0.024(13) 0.005(10) 0.017(14) 
C41 0.055(15) 0.072(19) 0.017(10) 0.025(11) 0.013(10) 0.018(15) 
C42 0.08(2) 0.10(2) 0.003(9) -0.002(12) 0.020(11) 0.018(19) 
C43 0.044(15) 0.11(3) 0.026(12) 0.022(14) 0.017(11) 0.040(17) 
C44 0.045(16) 0.13(3) 0.026(12) 0.011(15) 0.031(11) -0.001(17) 
C45 0.076(19) 0.035(17) 0.11(2) 0.030(15) 0.043(17) 0.026(15) 
C46 0.033(13) 0.10(2) 0.053(15) 0.032(15) 0.013(11) 0.014(14) 
C47 0.12(3) 0.16(4) 0.06(2) 0.03(2) 0.02(2) 0.02(3) 
C48 0.040(15) 0.13(3) 0.068(17) 0.026(17) 0.020(13) 0.053(17) 
C49 0.028(15) 0.24(4) 0.048(16) 0.01(2) 0.014(12) -0.01(2) 
O5WA 0.064(12) 0.112(17) 0.046(10) 0.003(10) -0.012(9) 0.030(12) 
O5WB 0.068(12) 0.048(12) 0.109(15) 0.036(11) 0.016(11) 0.020(10) 
O5WC 0.051(11) 0.076(14) 0.101(15) 0.017(12) -0.020(10) 0.000(10) 
O6WA 0.068(12) 0.093(15) 0.049(10) 0.009(10) 0.020(9) 0.031(11) 
O6WB 0.024(8) 0.070(12) 0.071(11) 0.014(9) -0.002(7) 0.024(8) 
O11T 0.096(17) 0.17(3) 0.043(11) -0.004(14) -0.024(11) 0.015(17) 
C11T 0.07(2) 0.17(4) 0.09(3) 0.02(2) -0.003(19) 0.04(2) 
C12T 0.30(6) 0.09(3) 0.025(15) -0.031(16) 0.06(3) -0.04(3) 
C13T 0.63(18) 0.63(18) 0.25(9) 0.25(10) 0.28(11) 0.57(16) 
C14T 0.16(4) 0.15(4) 0.18(5) -0.05(4) 0.08(4) 0.08(4) 
O21T 0.086(16) 0.18(3) 0.094(17) -0.028(16) 0.059(14) 0.024(16) 
C21T 0.09(3) 0.18(4) 0.13(3) -0.07(3) 0.06(3) 0.02(3) 
C22T 0.10(4) 0.39(9) 0.15(5) -0.08(5) 0.04(3) 0.06(5) 
C23T 0.14(5) 0.36(9) 0.09(3) -0.05(4) -0.01(3) 0.07(5) 
C24T 0.09(3) 0.28(6) 0.08(3) -0.05(4) 0.01(2) 0.01(4) 
 
_geom_special_details 
; 
 All esds (except the esd in the dihedral angle between two l.s. planes) 
 are estimated using the full covariance matrix.  The cell esds are taken 
 into account individually in the estimation of esds in distances, angles 
 and torsion angles; correlations between esds in cell parameters are only 
 used when they are defined by crystal symmetry.  An approximate (isotropic) 
 treatment of cell esds is used for estimating esds involving l.s. planes. 
; 
 
loop_ 
 _geom_bond_atom_site_label_1 
 _geom_bond_atom_site_label_2 
 _geom_bond_distance 
 _geom_bond_site_symmetry_2 
 _geom_bond_publ_flag 
Ce1 O21 2.371(13) . yes 
Ce1 O11 2.382(14) . yes 
Ce1 O1WA 2.500(15) . no 
Ce1 O1WB 2.503(16) . no 
Ce1 O1WC 2.533(16) . no 
Ce1 O2A 2.559(19) . no 
Ce1 O2B 2.62(2) . no 
Ce1 O1A 2.671(14) . no 
Ce1 O1B 2.687(17) . no 
Ce1 Mo2 4.055(3) . yes 
Ce2 O12 2.364(14) . yes 
Ce2 O22 2.444(16) . yes 
Ce2 O2WB 2.494(17) . no 
Ce2 O2WA 2.564(16) . no 
Ce2 O4A 2.587(18) . no 
Ce2 O4B 2.600(16) . no 
Ce2 O3B 2.66(2) . no 
Ce2 O3A 2.664(17) . no 
Ce2 O1A 2.779(13) . no 
Ce2 O1C 2.859(17) . no 
Ce3 O23 2.384(17) . yes 
Ce3 O13 2.412(15) . yes 
Ce3 O3WB 2.472(18) . no 
Ce3 O3WA 2.480(18) . no 
Ce3 O6B 2.57(2) . no 
Ce3 O5B 2.56(2) . no 
Ce3 O5A 2.605(19) . no 
Ce3 O6B 2.65(2) 2_666 no 
Ce3 O6A 2.722(19) . no 
Mo1 O13 1.745(16) . yes 
Mo1 O11 1.771(14) . yes 
Mo1 O12 1.799(14) . yes 
Mo1 C14 2.36(2) . no 
Mo1 C13 2.40(2) . no 
Mo1 C12 2.42(2) . no 
Mo1 C11 2.43(2) . no 
Mo1 C10 2.43(2) . no 
Mo2 O22 1.721(17) . yes 
Mo2 O21 1.772(14) . yes 
Mo2 O23 1.773(17) . yes 
Mo2 C22 2.37(2) . no 
Mo2 C24 2.44(3) . no 
Mo2 C21 2.44(2) . no 
Mo2 C23 2.45(2) . no 
Mo2 C20 2.463(19) . no 
N1A O1C 1.21(2) . no 
N1A O1B 1.26(2) . no 
N1A O1A 1.29(2) . no 
N2A O2C 1.18(3) . no 
N2A O2B 1.22(3) . no 
N2A O2A 1.27(3) . no 
N3A O3C 1.18(3) . no 
N3A O3A 1.24(3) . no 
N3A O3B 1.25(3) . no 
N4A O4C 1.20(3) . no 
N4A O4B 1.27(3) . no 
N4A O4A 1.27(2) . no 
N5A O5C 1.25(3) . no 
N5A O5B 1.29(3) . no 
N5A O5A 1.32(3) . no 
N6A O6C 1.18(4) . no 
N6A O6B 1.27(5) 2_666 no 
N6A O6A 1.31(3) . no 
O6B N6A 1.27(5) 2_666 no 
C10 C14 1.38(4) . no 
C10 C11 1.43(4) . no 
C10 C15 1.50(4) . no 
C11 C12 1.40(3) . no 
C11 C16 1.54(4) . no 
C12 C13 1.27(4) . no 
C12 C17 1.52(4) . no 
C13 C14 1.45(4) . no 
C13 C18 1.54(4) . no 
C14 C19 1.57(4) . no 
C20 C25 1.40(4) . no 
C20 C24 1.43(4) . no 
C20 C21 1.46(4) . no 
C21 C22 1.49(4) . no 
C21 C29 1.56(3) . no 
C22 C23 1.47(4) . no 
C22 C28 1.57(4) . no 
C23 C24 1.49(4) . no 
C23 C26 1.61(5) . no 
C24 C27 1.46(4) . no 
Ce4 O44 2.371(14) . yes 
Ce4 O34 2.404(13) . yes 
Ce4 O11A 2.523(17) . no 
Ce4 O11B 2.51(3) . no 
Ce4 O14B 2.57(2) . no 
Ce4 O13B 2.563(16) . no 
Ce4 O13A 2.596(18) . no 
Ce4 O14A 2.60(2) . no 
Ce4 O12B 2.634(16) . no 
Ce4 O12A 2.693(14) . no 
Ce5 O35 2.395(14) . yes 
Ce5 O45 2.419(13) . yes 
Ce5 O5WC 2.499(17) . no 
Ce5 O5WA 2.498(16) . no 
Ce5 O5WB 2.552(16) . no 
Ce5 O16A 2.576(18) . no 
Ce5 O16B 2.618(16) . no 
Ce5 O15A 2.611(16) . no 
Ce5 O15B 2.707(19) . no 
Ce5 Mo3 4.041(3) . yes 
Ce6 O46 2.464(15) . yes 
Ce6 O36 2.467(16) . yes 
Ce6 O6WB 2.488(13) . no 
Ce6 O6WA 2.512(17) . no 
Ce6 O18B 2.548(15) . no 
Ce6 O17A 2.598(16) . no 
Ce6 O17B 2.654(17) . no 
Ce6 O18A 2.668(19) . no 
Ce6 O15C 2.777(16) . no 
Ce6 O15A 2.816(15) . no 
Mo3 O36 1.734(16) . yes 
Mo3 O35 1.751(15) . yes 
Mo3 O34 1.749(14) . yes 
Mo3 C31 2.38(2) . no 
Mo3 C32 2.39(2) . no 
Mo3 C30 2.44(2) . no 
Mo3 C33 2.44(3) . no 
Mo3 C34 2.46(2) . no 
Mo4 O46 1.728(16) . yes 
Mo4 O45 1.766(14) . yes 
Mo4 O44 1.771(14) . yes 
Mo4 C43 2.39(2) . no 
Mo4 C42 2.39(2) . no 
Mo4 C44 2.41(2) . no 
Mo4 C41 2.434(18) . no 
Mo4 C40 2.47(2) . no 
N11A O11C 1.15(3) . no 
N11A O11B 1.16(4) . no 
N11A O11A 1.29(4) . no 
N12A O12C 1.24(2) . no 
N12A O12A 1.25(2) . no 
N12A O12B 1.25(3) . no 
N13A O13C 1.22(3) . no 
N13A O13A 1.26(3) . no 
N13A O13B 1.30(3) . no 
N14A O14C 1.20(3) . no 
N14A O14B 1.23(3) . no 
N14A O14A 1.25(3) . no 
N15A O15C 1.21(2) . no 
N15A O15B 1.21(2) . no 
N15A O15A 1.29(2) . no 
N16A O16C 1.20(3) . no 
N16A O16A 1.26(3) . no 
N16A O16B 1.28(3) . no 
N17A O17C 1.22(2) . no 
N17A O17A 1.23(3) . no 
N17A O17B 1.32(3) . no 
N18A O18C 1.18(3) . no 
N18A O18A 1.28(3) . no 
N18A O18B 1.31(3) . no 
C30 C31 1.39(3) . no 
C30 C34 1.43(3) . no 
C30 C35 1.54(3) . no 
C31 C32 1.48(4) . no 
C31 C36 1.67(4) . no 
C32 C33 1.38(5) . no 
C32 C37 1.67(5) . no 
C33 C34 1.37(4) . no 
C33 C38 1.49(4) . no 
C34 C39 1.42(4) . no 
C40 C41 1.36(3) . no 
C40 C44 1.44(3) . no 
C40 C45 1.45(3) . no 
C41 C42 1.47(3) . no 
C41 C46 1.53(3) . no 
C42 C43 1.43(3) . no 
C42 C47 1.58(4) . no 
C43 C44 1.37(4) . no 
C43 C48 1.54(3) . no 
C44 C49 1.52(4) . no 
O11T C11T 1.43(3) . no 
O11T C14T 1.43(4) . no 
C11T C12T 1.57(5) . no 
C12T C13T 1.36(8) . no 
C13T C14T 1.48(9) . no 
O21T C21T 1.48(4) . no 
O21T C24T 1.51(4) . no 
C21T C22T 1.46(6) . no 
C22T C23T 1.55(6) . no 
C23T C24T 1.40(6) . no 
 
loop_ 
 _geom_angle_atom_site_label_1 
 _geom_angle_atom_site_label_2 
 _geom_angle_atom_site_label_3 
 _geom_angle 
 _geom_angle_site_symmetry_1 
 _geom_angle_site_symmetry_3 
 _geom_angle_publ_flag 
O21 Ce1 O11 84.6(5) . . no 
O21 Ce1 O1WA 103.6(5) . . no 
O11 Ce1 O1WA 171.6(5) . . no 
O21 Ce1 O1WB 143.3(5) . . no 
O11 Ce1 O1WB 89.4(6) . . no 
O1WA Ce1 O1WB 82.7(6) . . no 
O21 Ce1 O1WC 145.3(6) . . no 
O11 Ce1 O1WC 93.3(6) . . no 
O1WA Ce1 O1WC 81.3(6) . . no 
O1WB Ce1 O1WC 71.0(6) . . no 
O21 Ce1 O2A 74.5(6) . . no 
O11 Ce1 O2A 70.9(6) . . no 
O1WA Ce1 O2A 113.1(6) . . no 
O1WB Ce1 O2A 136.8(5) . . no 
O1WC Ce1 O2A 72.2(6) . . no 
O21 Ce1 O2B 73.8(6) . . no 
O11 Ce1 O2B 118.3(6) . . no 
O1WA Ce1 O2B 67.0(6) . . no 
O1WB Ce1 O2B 138.7(6) . . no 
O1WC Ce1 O2B 77.0(6) . . no 
O2A Ce1 O2B 47.9(6) . . no 
O21 Ce1 O1A 71.4(5) . . no 
O11 Ce1 O1A 68.5(5) . . no 
O1WA Ce1 O1A 111.6(5) . . no 
O1WB Ce1 O1A 72.7(5) . . no 
O1WC Ce1 O1A 139.4(6) . . no 
O2A Ce1 O1A 128.4(5) . . no 
O2B Ce1 O1A 143.6(6) . . no 
O21 Ce1 O1B 76.9(5) . . no 
O11 Ce1 O1B 115.9(5) . . no 
O1WA Ce1 O1B 64.7(5) . . no 
O1WB Ce1 O1B 73.3(5) . . no 
O1WC Ce1 O1B 133.1(5) . . no 
O2A Ce1 O1B 149.8(5) . . no 
O2B Ce1 O1B 114.1(6) . . no 
O1A Ce1 O1B 47.4(5) . . no 
O12 Ce2 O22 85.3(5) . . no 
O12 Ce2 O2WB 90.0(5) . . no 
O22 Ce2 O2WB 140.2(5) . . no 
O12 Ce2 O2WA 170.0(5) . . no 
O22 Ce2 O2WA 91.6(5) . . no 
O2WB Ce2 O2WA 86.4(5) . . no 
O12 Ce2 O4A 71.5(5) . . no 
O22 Ce2 O4A 71.4(5) . . no 
O2WB Ce2 O4A 143.3(6) . . no 
O2WA Ce2 O4A 116.5(5) . . no 
O12 Ce2 O4B 119.8(6) . . no 
O22 Ce2 O4B 74.7(6) . . no 
O2WB Ce2 O4B 138.9(6) . . no 
O2WA Ce2 O4B 68.2(6) . . no 
O4A Ce2 O4B 48.3(6) . . no 
O12 Ce2 O3B 121.1(6) . . no 
O22 Ce2 O3B 139.8(6) . . no 
O2WB Ce2 O3B 74.7(7) . . no 
O2WA Ce2 O3B 66.8(7) . . no 
O4A Ce2 O3B 87.9(7) . . no 
O4B Ce2 O3B 65.9(7) . . no 
O12 Ce2 O3A 74.8(6) . . no 
O22 Ce2 O3A 142.5(6) . . no 
O2WB Ce2 O3A 72.4(6) . . no 
O2WA Ce2 O3A 112.8(6) . . no 
O4A Ce2 O3A 72.3(6) . . no 
O4B Ce2 O3A 87.9(7) . . no 
O3B Ce2 O3A 46.3(7) . . no 
O12 Ce2 O1A 65.5(5) . . no 
O22 Ce2 O1A 68.4(5) . . no 
O2WB Ce2 O1A 73.6(5) . . no 
O2WA Ce2 O1A 104.5(5) . . no 
O4A Ce2 O1A 122.2(5) . . no 
O4B Ce2 O1A 142.3(6) . . no 
O3B Ce2 O1A 147.6(7) . . no 
O3A Ce2 O1A 126.8(5) . . no 
O12 Ce2 O1C 110.3(5) . . no 
O22 Ce2 O1C 75.4(5) . . no 
O2WB Ce2 O1C 69.3(5) . . no 
O2WA Ce2 O1C 59.7(5) . . no 
O4A Ce2 O1C 146.5(5) . . no 
O4B Ce2 O1C 117.9(7) . . no 
O3B Ce2 O1C 115.8(7) . . no 
O3A Ce2 O1C 141.2(6) . . no 
O1A Ce2 O1C 45.0(4) . . no 
O23 Ce3 O13 81.5(5) . . no 
O23 Ce3 O3WB 83.3(6) . . no 
O13 Ce3 O3WB 73.8(7) . . no 
O23 Ce3 O3WA 85.2(6) . . no 
O13 Ce3 O3WA 74.5(6) . . no 
O3WB Ce3 O3WA 147.5(7) . . no 
O23 Ce3 O6B 107.7(6) . . no 
O13 Ce3 O6B 142.8(6) . . no 
O3WB Ce3 O6B 71.7(7) . . no 
O3WA Ce3 O6B 140.8(6) . . no 
O23 Ce3 O5B 126.1(6) . . no 
O13 Ce3 O5B 138.5(7) . . no 
O3WB Ce3 O5B 132.7(7) . . no 
O3WA Ce3 O5B 77.7(7) . . no 
O6B Ce3 O5B 64.7(7) . . no 
O23 Ce3 O5A 75.3(6) . . no 
O13 Ce3 O5A 143.6(7) . . no 
O3WB Ce3 O5A 129.4(8) . . no 
O3WA Ce3 O5A 75.9(8) . . no 
O6B Ce3 O5A 72.2(7) . . no 
O5B Ce3 O5A 51.0(6) . . no 
O23 Ce3 O6B 152.1(6) . 2_666 no 
O13 Ce3 O6B 100.3(6) . 2_666 no 
O3WB Ce3 O6B 70.8(6) . 2_666 no 
O3WA Ce3 O6B 122.3(7) . 2_666 no 
O6B Ce3 O6B 55.1(8) . 2_666 no 
O5B Ce3 O6B 70.0(7) . 2_666 no 
O5A Ce3 O6B 113.3(7) . 2_666 no 
O23 Ce3 O6A 155.4(7) . . no 
O13 Ce3 O6A 78.3(6) . . no 
O3WB Ce3 O6A 104.3(8) . . no 
O3WA Ce3 O6A 75.9(8) . . no 
O6B Ce3 O6A 96.9(8) . . no 
O5B Ce3 O6A 65.4(6) . . no 
O5A Ce3 O6A 114.1(7) . . no 
O6B Ce3 O6A 47.5(7) 2_666 . no 
O13 Mo1 O11 106.3(8) . . no 
O13 Mo1 O12 106.2(7) . . no 
O11 Mo1 O12 105.6(7) . . no 
O13 Mo1 C14 121.1(11) . . no 
O11 Mo1 C14 126.5(10) . . no 
O12 Mo1 C14 84.9(9) . . no 
O13 Mo1 C13 141.4(8) . . no 
O11 Mo1 C13 91.7(9) . . no 
O12 Mo1 C13 101.1(9) . . no 
C14 Mo1 C13 35.3(10) . . no 
O13 Mo1 C12 116.3(8) . . no 
O11 Mo1 C12 84.3(9) . . no 
O12 Mo1 C12 131.7(9) . . no 
C14 Mo1 C12 54.3(11) . . no 
C13 Mo1 C12 30.6(9) . . no 
O13 Mo1 C11 86.2(8) . . no 
O11 Mo1 C11 107.7(8) . . no 
O12 Mo1 C11 139.4(8) . . no 
C14 Mo1 C11 56.6(10) . . no 
C13 Mo1 C11 55.6(9) . . no 
C12 Mo1 C11 33.7(8) . . no 
O13 Mo1 C10 90.0(9) . . no 
O11 Mo1 C10 138.6(8) . . no 
O12 Mo1 C10 105.9(10) . . no 
C14 Mo1 C10 33.4(9) . . no 
C13 Mo1 C10 56.2(9) . . no 
C12 Mo1 C10 54.6(10) . . no 
C11 Mo1 C10 34.3(9) . . no 
O22 Mo2 O21 104.4(7) . . no 
O22 Mo2 O23 105.6(8) . . no 
O21 Mo2 O23 106.0(8) . . no 
O22 Mo2 C22 142.9(8) . . no 
O21 Mo2 C22 92.7(9) . . no 
O23 Mo2 C22 100.8(10) . . no 
O22 Mo2 C24 88.8(9) . . no 
O21 Mo2 C24 141.6(10) . . no 
O23 Mo2 C24 104.8(10) . . no 
C22 Mo2 C24 59.2(10) . . no 
O22 Mo2 C21 112.3(9) . . no 
O21 Mo2 C21 84.6(8) . . no 
O23 Mo2 C21 136.6(9) . . no 
C22 Mo2 C21 36.0(9) . . no 
C24 Mo2 C21 57.2(10) . . no 
O22 Mo2 C23 122.5(10) . . no 
O21 Mo2 C23 127.5(10) . . no 
O23 Mo2 C23 84.3(9) . . no 
C22 Mo2 C23 35.4(9) . . no 
C24 Mo2 C23 35.5(10) . . no 
C21 Mo2 C23 58.0(9) . . no 
O22 Mo2 C20 83.7(9) . . no 
O21 Mo2 C20 110.7(8) . . no 
O23 Mo2 C20 138.4(8) . . no 
C22 Mo2 C20 59.3(9) . . no 
C24 Mo2 C20 33.9(9) . . no 
C21 Mo2 C20 34.5(8) . . no 
C23 Mo2 C20 58.0(10) . . no 
Mo1 O11 Ce1 154.7(8) . . no 
Mo1 O12 Ce2 155.3(8) . . no 
Mo1 O13 Ce3 163.9(9) . . no 
Mo2 O21 Ce1 156.1(8) . . no 
Mo2 O22 Ce2 159.1(8) . . no 
Mo2 O23 Ce3 162.1(8) . . no 
O1C N1A O1B 125(2) . . no 
O1C N1A O1A 120.0(19) . . no 
O1B N1A O1A 115.3(18) . . no 
N1A O1A Ce1 98.2(12) . . no 
N1A O1A Ce2 97.6(11) . . no 
Ce1 O1A Ce2 150.4(7) . . no 
N1A O1A Mo1 169.4(13) . . no 
Ce1 O1A Mo1 80.5(4) . . no 
Ce2 O1A Mo1 79.4(4) . . no 
N1A O1B Ce1 98.1(13) . . no 
N1A O1C Ce2 95.8(13) . . no 
O2C N2A O2B 128(3) . . no 
O2C N2A O2A 117(3) . . no 
O2B N2A O2A 115(3) . . no 
N2A O2A Ce1 99.2(16) . . no 
N2A O2B Ce1 97.5(18) . . no 
O3C N3A O3A 127(3) . . no 
O3C N3A O3B 118(3) . . no 
O3A N3A O3B 114(3) . . no 
N3A O3A Ce2 99.5(16) . . no 
N3A O3B Ce2 99.7(19) . . no 
O4C N4A O4B 126(3) . . no 
O4C N4A O4A 120(3) . . no 
O4B N4A O4A 113(2) . . no 
N4A O4A Ce2 99.4(16) . . no 
N4A O4B Ce2 98.7(14) . . no 
O5C N5A O5B 118(3) . . no 
O5C N5A O5A 123(4) . . no 
O5B N5A O5A 117(2) . . no 
N5A O5A Ce3 94.5(18) . . no 
N5A O5B Ce3 97.2(17) . . no 
O6C N6A O6B 129(4) . 2_666 no 
O6C N6A O6A 116(5) . . no 
O6B N6A O6A 114(4) 2_666 . no 
N6A O6A Ce3 96(3) . . no 
N6A O6B Ce3 122(2) 2_666 . no 
N6A O6B Ce3 101(2) 2_666 2_666 no 
Ce3 O6B Ce3 124.9(8) . 2_666 no 
C14 C10 C11 108(3) . . no 
C14 C10 C15 131(4) . . no 
C11 C10 C15 120(3) . . no 
C14 C10 Mo1 70.4(14) . . no 
C11 C10 Mo1 72.6(14) . . no 
C15 C10 Mo1 116.6(16) . . no 
C12 C11 C10 103(3) . . no 
C12 C11 C16 127(3) . . no 
C10 C11 C16 129(3) . . no 
C12 C11 Mo1 72.9(13) . . no 
C10 C11 Mo1 73.1(13) . . no 
C16 C11 Mo1 118.8(16) . . no 
C13 C12 C11 114(3) . . no 
C13 C12 C17 119(3) . . no 
C11 C12 C17 126(3) . . no 
C13 C12 Mo1 73.8(16) . . no 
C11 C12 Mo1 73.4(12) . . no 
C17 C12 Mo1 117.9(19) . . no 
C12 C13 C14 107(3) . . no 
C12 C13 C18 132(3) . . no 
C14 C13 C18 121(3) . . no 
C12 C13 Mo1 75.6(15) . . no 
C14 C13 Mo1 70.8(13) . . no 
C18 C13 Mo1 116.2(17) . . no 
C10 C14 C13 107(3) . . no 
C10 C14 C19 124(3) . . no 
C13 C14 C19 128(3) . . no 
C10 C14 Mo1 76.1(15) . . no 
C13 C14 Mo1 73.8(14) . . no 
C19 C14 Mo1 122.8(18) . . no 
C25 C20 C24 124(3) . . no 
C25 C20 C21 128(3) . . no 
C24 C20 C21 108(2) . . no 
C25 C20 Mo2 123.0(16) . . no 
C24 C20 Mo2 72.2(13) . . no 
C21 C20 Mo2 72.0(12) . . no 
C20 C21 C22 109(2) . . no 
C20 C21 C29 124(3) . . no 
C22 C21 C29 127(3) . . no 
C20 C21 Mo2 73.5(11) . . no 
C22 C21 Mo2 69.2(12) . . no 
C29 C21 Mo2 119.1(15) . . no 
C23 C22 C21 107(3) . . no 
C23 C22 C28 132(4) . . no 
C21 C22 C28 121(3) . . no 
C23 C22 Mo2 75.4(15) . . no 
C21 C22 Mo2 74.8(13) . . no 
C28 C22 Mo2 119.3(16) . . no 
C22 C23 C24 107(3) . . no 
C22 C23 C26 116(4) . . no 
C24 C23 C26 137(3) . . no 
C22 C23 Mo2 69.2(13) . . no 
C24 C23 Mo2 71.9(15) . . no 
C26 C23 Mo2 122.1(18) . . no 
C20 C24 C27 129(3) . . no 
C20 C24 C23 109(3) . . no 
C27 C24 C23 122(3) . . no 
C20 C24 Mo2 73.9(13) . . no 
C27 C24 Mo2 120(2) . . no 
C23 C24 Mo2 72.6(14) . . no 
O44 Ce4 O34 83.4(5) . . no 
O44 Ce4 O11A 121.8(6) . . no 
O34 Ce4 O11A 75.3(6) . . no 
O44 Ce4 O11B 72.9(6) . . no 
O34 Ce4 O11B 71.4(6) . . no 
O11A Ce4 O11B 49.1(6) . . no 
O44 Ce4 O14B 97.3(7) . . no 
O34 Ce4 O14B 116.0(6) . . no 
O11A Ce4 O14B 140.7(7) . . no 
O11B Ce4 O14B 167.5(7) . . no 
O44 Ce4 O13B 154.2(5) . . no 
O34 Ce4 O13B 122.2(5) . . no 
O11A Ce4 O13B 72.7(7) . . no 
O11B Ce4 O13B 115.8(6) . . no 
O14B Ce4 O13B 69.8(7) . . no 
O44 Ce4 O13A 149.0(6) . . no 
O34 Ce4 O13A 75.5(5) . . no 
O11A Ce4 O13A 74.6(7) . . no 
O11B Ce4 O13A 119.6(7) . . no 
O14B Ce4 O13A 72.7(7) . . no 
O13B Ce4 O13A 50.3(5) . . no 
O44 Ce4 O14A 73.6(7) . . no 
O34 Ce4 O14A 72.9(6) . . no 
O11A Ce4 O14A 142.6(7) . . no 
O11B Ce4 O14A 133.0(6) . . no 
O14B Ce4 O14A 47.3(6) . . no 
O13B Ce4 O14A 108.7(7) . . no 
O13A Ce4 O14A 78.6(8) . . no 
O44 Ce4 O12B 90.0(5) . . no 
O34 Ce4 O12B 137.4(6) . . no 
O11A Ce4 O12B 72.8(6) . . no 
O11B Ce4 O12B 66.4(6) . . no 
O14B Ce4 O12B 106.6(6) . . no 
O13B Ce4 O12B 73.4(6) . . no 
O13A Ce4 O12B 120.9(6) . . no 
O14A Ce4 O12B 144.5(7) . . no 
O44 Ce4 O12A 82.7(5) . . no 
O34 Ce4 O12A 165.5(5) . . no 
O11A Ce4 O12A 116.1(6) . . no 
O11B Ce4 O12A 108.5(6) . . no 
O14B Ce4 O12A 61.7(6) . . no 
O13B Ce4 O12A 71.4(6) . . no 
O13A Ce4 O12A 115.2(6) . . no 
O14A Ce4 O12A 98.8(7) . . no 
O12B Ce4 O12A 47.1(5) . . no 
O35 Ce5 O45 84.1(5) . . no 
O35 Ce5 O5WC 77.3(6) . . no 
O45 Ce5 O5WC 72.0(6) . . no 
O35 Ce5 O5WA 84.6(5) . . no 
O45 Ce5 O5WA 146.5(6) . . no 
O5WC Ce5 O5WA 135.1(7) . . no 
O35 Ce5 O5WB 95.2(6) . . no 
O45 Ce5 O5WB 140.0(6) . . no 
O5WC Ce5 O5WB 68.9(6) . . no 
O5WA Ce5 O5WB 72.4(6) . . no 
O35 Ce5 O16A 153.0(6) . . no 
O45 Ce5 O16A 81.9(5) . . no 
O5WC Ce5 O16A 76.4(8) . . no 
O5WA Ce5 O16A 119.0(6) . . no 
O5WB Ce5 O16A 81.1(7) . . no 
O35 Ce5 O16B 153.8(5) . . no 
O45 Ce5 O16B 121.5(6) . . no 
O5WC Ce5 O16B 113.6(6) . . no 
O5WA Ce5 O16B 71.0(6) . . no 
O5WB Ce5 O16B 69.2(6) . . no 
O16A Ce5 O16B 48.3(6) . . no 
O35 Ce5 O15A 70.7(5) . . no 
O45 Ce5 O15A 73.4(5) . . no 
O5WC Ce5 O15A 134.6(5) . . no 
O5WA Ce5 O15A 73.1(5) . . no 
O5WB Ce5 O15A 143.8(5) . . no 
O16A Ce5 O15A 126.2(6) . . no 
O16B Ce5 O15A 109.2(5) . . no 
O35 Ce5 O15B 117.7(6) . . no 
O45 Ce5 O15B 74.0(6) . . no 
O5WC Ce5 O15B 141.0(6) . . no 
O5WA Ce5 O15B 83.7(6) . . no 
O5WB Ce5 O15B 137.3(5) . . no 
O16A Ce5 O15B 80.3(7) . . no 
O16B Ce5 O15B 69.7(6) . . no 
O15A Ce5 O15B 47.4(5) . . no 
O46 Ce6 O36 80.5(5) . . no 
O46 Ce6 O6WB 71.3(5) . . no 
O36 Ce6 O6WB 80.2(5) . . no 
O46 Ce6 O6WA 144.9(5) . . no 
O36 Ce6 O6WA 83.0(6) . . no 
O6WB Ce6 O6WA 75.5(5) . . no 
O46 Ce6 O18B 75.7(6) . . no 
O36 Ce6 O18B 155.7(6) . . no 
O6WB Ce6 O18B 87.4(6) . . no 
O6WA Ce6 O18B 114.2(7) . . no 
O46 Ce6 O17A 136.8(6) . . no 
O36 Ce6 O17A 82.5(5) . . no 
O6WB Ce6 O17A 143.1(6) . . no 
O6WA Ce6 O17A 70.3(6) . . no 
O18B Ce6 O17A 118.7(6) . . no 
O46 Ce6 O17B 135.7(5) . . no 
O36 Ce6 O17B 131.3(5) . . no 
O6WB Ce6 O17B 134.6(6) . . no 
O6WA Ce6 O17B 77.3(6) . . no 
O18B Ce6 O17B 71.6(6) . . no 
O17A Ce6 O17B 49.0(5) . . no 
O46 Ce6 O18A 111.8(5) . . no 
O36 Ce6 O18A 141.3(5) . . no 
O6WB Ce6 O18A 70.5(5) . . no 
O6WA Ce6 O18A 65.9(5) . . no 
O18B Ce6 O18A 48.5(6) . . no 
O17A Ce6 O18A 106.3(6) . . no 
O17B Ce6 O18A 65.4(6) . . no 
O46 Ce6 O15C 72.2(5) . . no 
O36 Ce6 O15C 111.2(6) . . no 
O6WB Ce6 O15C 139.1(5) . . no 
O6WA Ce6 O15C 142.9(5) . . no 
O18B Ce6 O15C 66.1(6) . . no 
O17A Ce6 O15C 77.7(6) . . no 
O17B Ce6 O15C 67.6(6) . . no 
O18A Ce6 O15C 107.5(6) . . no 
O46 Ce6 O15A 68.7(4) . . no 
O36 Ce6 O15A 66.3(5) . . no 
O6WB Ce6 O15A 130.9(5) . . no 
O6WA Ce6 O15A 130.6(5) . . no 
O18B Ce6 O15A 108.6(6) . . no 
O17A Ce6 O15A 68.1(5) . . no 
O17B Ce6 O15A 94.3(5) . . no 
O18A Ce6 O15A 152.2(5) . . no 
O15C Ce6 O15A 45.1(5) . . no 
O36 Mo3 O35 107.0(7) . . no 
O36 Mo3 O34 105.6(7) . . no 
O35 Mo3 O34 106.3(7) . . no 
O36 Mo3 C31 141.9(8) . . no 
O35 Mo3 C31 99.4(9) . . no 
O34 Mo3 C31 92.4(8) . . no 
O36 Mo3 C32 119.2(13) . . no 
O35 Mo3 C32 84.9(9) . . no 
O34 Mo3 C32 128.3(11) . . no 
C31 Mo3 C32 36.1(10) . . no 
O36 Mo3 C30 114.7(8) . . no 
O35 Mo3 C30 132.7(8) . . no 
O34 Mo3 C30 83.5(7) . . no 
C31 Mo3 C30 33.4(8) . . no 
C32 Mo3 C30 56.1(8) . . no 
O36 Mo3 C33 88.2(9) . . no 
O35 Mo3 C33 106.0(10) . . no 
O34 Mo3 C33 139.1(8) . . no 
C31 Mo3 C33 57.9(9) . . no 
C32 Mo3 C33 33.3(11) . . no 
C30 Mo3 C33 56.1(8) . . no 
O36 Mo3 C34 86.0(9) . . no 
O35 Mo3 C34 137.3(7) . . no 
O34 Mo3 C34 108.9(8) . . no 
C31 Mo3 C34 56.2(10) . . no 
C32 Mo3 C34 54.3(11) . . no 
C30 Mo3 C34 33.9(8) . . no 
C33 Mo3 C34 32.4(9) . . no 
O46 Mo4 O45 106.0(7) . . no 
O46 Mo4 O44 106.1(7) . . no 
O45 Mo4 O44 106.2(8) . . no 
O46 Mo4 C43 122.9(9) . . no 
O45 Mo4 C43 83.3(8) . . no 
O44 Mo4 C43 125.5(8) . . no 
O46 Mo4 C42 141.7(9) . . no 
O45 Mo4 C42 101.0(9) . . no 
O44 Mo4 C42 91.6(8) . . no 
C43 Mo4 C42 34.9(8) . . no 
O46 Mo4 C44 91.2(9) . . no 
O45 Mo4 C44 102.2(10) . . no 
O44 Mo4 C44 140.8(7) . . no 
C43 Mo4 C44 33.3(9) . . no 
C42 Mo4 C44 56.5(9) . . no 
O46 Mo4 C41 111.2(8) . . no 
O45 Mo4 C41 136.1(8) . . no 
O44 Mo4 C41 85.2(7) . . no 
C43 Mo4 C41 57.3(8) . . no 
C42 Mo4 C41 35.4(8) . . no 
C44 Mo4 C41 55.5(8) . . no 
O46 Mo4 C40 85.2(8) . . no 
O45 Mo4 C40 136.2(8) . . no 
O44 Mo4 C40 111.0(7) . . no 
C43 Mo4 C40 56.5(9) . . no 
C42 Mo4 C40 56.5(10) . . no 
C44 Mo4 C40 34.3(8) . . no 
C41 Mo4 C40 32.2(7) . . no 
Mo3 O34 Ce4 159.1(8) . . no 
Mo3 O35 Ce5 153.8(9) . . no 
Mo3 O36 Ce6 158.2(8) . . no 
Mo4 O44 Ce4 162.9(7) . . no 
Mo4 O45 Ce5 152.3(9) . . no 
Mo4 O46 Ce6 158.9(8) . . no 
O11C N11A O11B 129(4) . . no 
O11C N11A O11A 113(4) . . no 
O11B N11A O11A 117(2) . . no 
N11A O11A Ce4 94.0(19) . . no 
N11A O11B Ce4 98(2) . . no 
O12C N12A O12A 118(2) . . no 
O12C N12A O12B 125(2) . . no 
O12A N12A O12B 116.9(19) . . no 
N12A O12A Ce4 96.4(13) . . no 
N12A O12B Ce4 99.6(13) . . no 
O13C N13A O13A 122(3) . . no 
O13C N13A O13B 120(2) . . no 
O13A N13A O13B 118(2) . . no 
N13A O13A Ce4 95.6(15) . . no 
N13A O13B Ce4 96.1(13) . . no 
O14C N14A O14B 127(3) . . no 
O14C N14A O14A 119(3) . . no 
O14B N14A O14A 113(3) . . no 
N14A O14A Ce4 98.1(16) . . no 
N14A O14B Ce4 100.8(18) . . no 
O15C N15A O15B 123(2) . . no 
O15C N15A O15A 119(2) . . no 
O15B N15A O15A 118(2) . . no 
N15A O15A Ce5 97.8(13) . . no 
N15A O15A Ce6 95.1(12) . . no 
Ce5 O15A Ce6 150.5(6) . . no 
N15A O15B Ce5 95.2(14) . . no 
N15A O15C Ce6 99.0(13) . . no 
O16C N16A O16A 126(3) . . no 
O16C N16A O16B 120(3) . . no 
O16A N16A O16B 114(2) . . no 
N16A O16A Ce5 100.2(15) . . no 
N16A O16B Ce5 97.4(14) . . no 
O17C N17A O17A 124(3) . . no 
O17C N17A O17B 119(3) . . no 
O17A N17A O17B 117(2) . . no 
N17A O17A Ce6 99.6(15) . . no 
N17A O17B Ce6 94.5(15) . . no 
O18C N18A O18A 121(3) . . no 
O18C N18A O18B 127(2) . . no 
O18A N18A O18B 112(2) . . no 
N18A O18A Ce6 97.3(16) . . no 
N18A O18B Ce6 102.3(15) . . no 
C31 C30 C34 108(2) . . no 
C31 C30 C35 127(3) . . no 
C34 C30 C35 125(3) . . no 
C31 C30 Mo3 70.9(13) . . no 
C34 C30 Mo3 73.6(12) . . no 
C35 C30 Mo3 121.8(16) . . no 
C30 C31 C32 105(3) . . no 
C30 C31 C36 127(3) . . no 
C32 C31 C36 128(3) . . no 
C30 C31 Mo3 75.7(14) . . no 
C32 C31 Mo3 72.3(13) . . no 
C36 C31 Mo3 119.7(15) . . no 
C33 C32 C31 109(3) . . no 
C33 C32 C37 140(3) . . no 
C31 C32 C37 111(4) . . no 
C33 C32 Mo3 75.1(16) . . no 
C31 C32 Mo3 71.6(12) . . no 
C37 C32 Mo3 117.4(18) . . no 
C34 C33 C32 107(3) . . no 
C34 C33 C38 132(4) . . no 
C32 C33 C38 120(3) . . no 
C34 C33 Mo3 74.7(14) . . no 
C32 C33 Mo3 71.6(16) . . no 
C38 C33 Mo3 120.5(18) . . no 
C33 C34 C39 120(3) . . no 
C33 C34 C30 110(3) . . no 
C39 C34 C30 130(3) . . no 
C33 C34 Mo3 72.9(16) . . no 
C39 C34 Mo3 120.6(18) . . no 
C30 C34 Mo3 72.4(12) . . no 
C41 C40 C44 108(2) . . no 
C41 C40 C45 129(2) . . no 
C44 C40 C45 123(2) . . no 
C41 C40 Mo4 72.5(13) . . no 
C44 C40 Mo4 70.8(12) . . no 
C45 C40 Mo4 121.6(17) . . no 
C40 C41 C42 109(2) . . no 
C40 C41 C46 126(2) . . no 
C42 C41 C46 125(2) . . no 
C40 C41 Mo4 75.3(12) . . no 
C42 C41 Mo4 70.8(11) . . no 
C46 C41 Mo4 119.7(14) . . no 
C43 C42 C41 106(3) . . no 
C43 C42 C47 127(3) . . no 
C41 C42 C47 128(3) . . no 
C43 C42 Mo4 72.3(12) . . no 
C41 C42 Mo4 73.8(12) . . no 
C47 C42 Mo4 118.2(17) . . no 
C44 C43 C42 108(2) . . no 
C44 C43 C48 128(3) . . no 
C42 C43 C48 123(3) . . no 
C44 C43 Mo4 74.4(13) . . no 
C42 C43 Mo4 72.9(12) . . no 
C48 C43 Mo4 119.9(15) . . no 
C43 C44 C40 110(2) . . no 
C43 C44 C49 125(3) . . no 
C40 C44 C49 126(3) . . no 
C43 C44 Mo4 72.3(13) . . no 
C40 C44 Mo4 75.0(12) . . no 
C49 C44 Mo4 119.9(16) . . no 
C11T O11T C14T 112(3) . . no 
O11T C11T C12T 98(3) . . no 
C13T C12T C11T 109(4) . . no 
C12T C13T C14T 110(5) . . no 
O11T C14T C13T 103(4) . . no 
C21T O21T C24T 111(2) . . no 
O21T C21T C22T 103(3) . . no 
C21T C22T C23T 110(4) . . no 
C24T C23T C22T 107(4) . . no 
C23T C24T O21T 108(4) . . no 
 
_diffrn_measured_fraction_theta_max    0.999 
_diffrn_reflns_theta_full              25.00 
_diffrn_measured_fraction_theta_full   0.999 
_refine_diff_density_max    2.955 
_refine_diff_density_min   -1.419 
_refine_diff_density_rms    0.260 

#===END
